# Supplementary material for: Prdm5 Regulates Collagen Gene Transcription by Association with RNA Polymerase II in Developing Bone
Source: PubMed Central journal article supplement (PMC3349747; doi:10.1371/journal.pgen.1002711), 2012-05-10

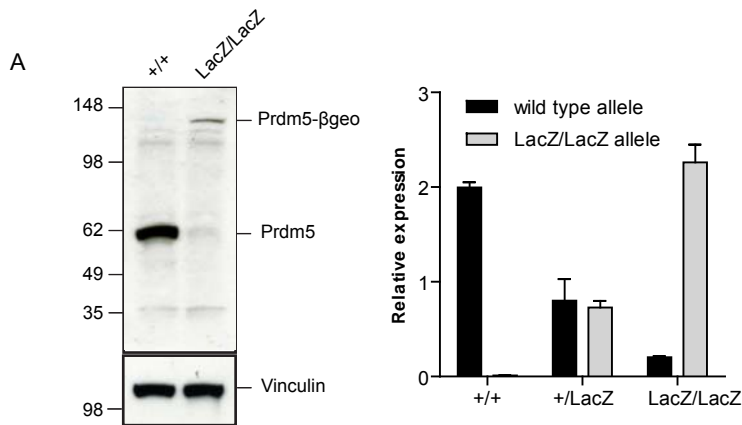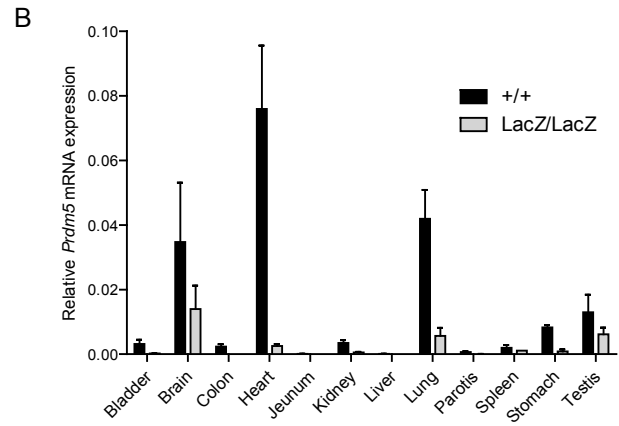

**C**

|         | +/+     | +/LacZ  | LacZ/LacZ | Total |
|---------|---------|---------|-----------|-------|
| Males   | 31 (26) | 47 (52) | 32 (26)   | 110   |
| Females | 23 (26) | 54 (52) | 22 (26)   | 99    |
|         | 54      | 101     | 54        | 209   |

$\chi^2$  p-value = 0.8676

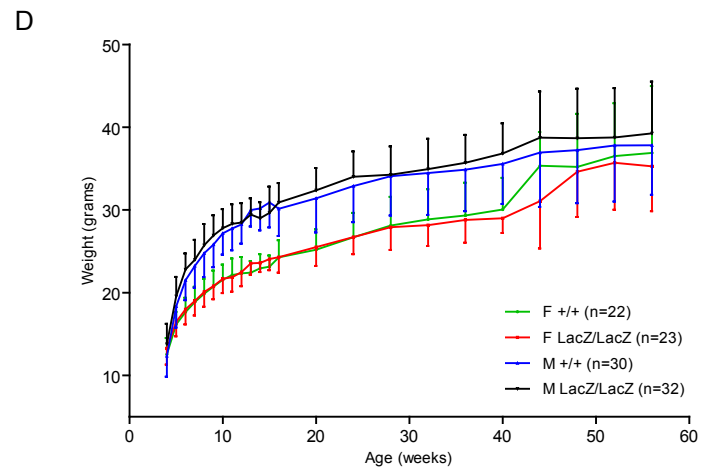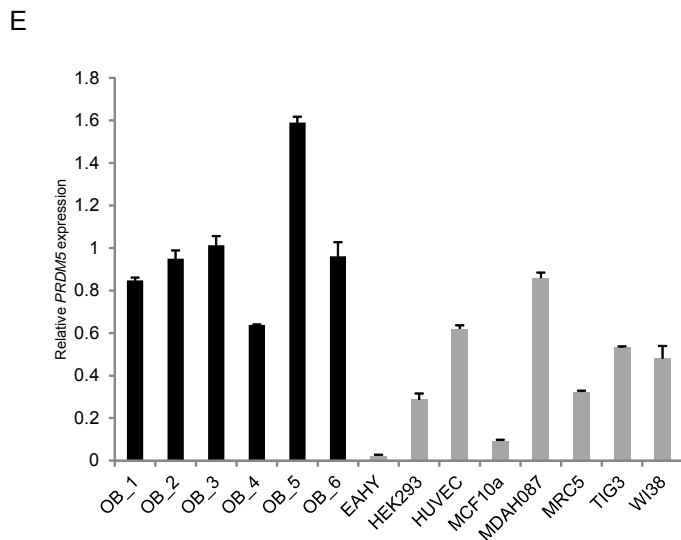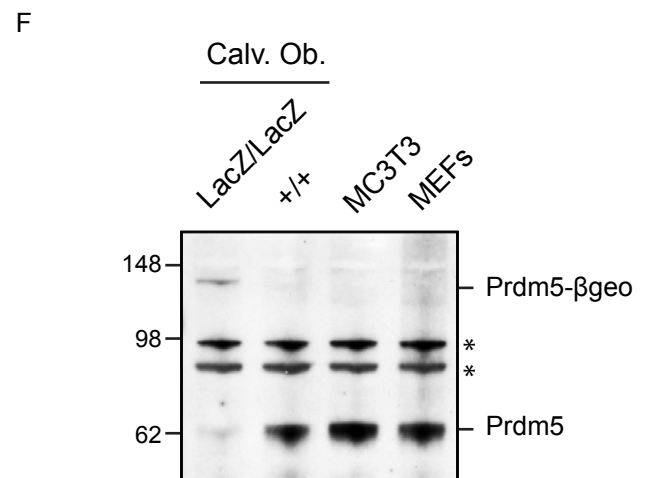

Supplement: pgen.1002711.s001.pdf [file pgen.1002711.s001.pdf]
