# Supplementary material for: Prdm5 Regulates Collagen Gene Transcription by Association with RNA Polymerase II in Developing Bone
Source: PubMed Central journal article supplement (PMC3349747; doi:10.1371/journal.pgen.1002711), 2012-05-10

A

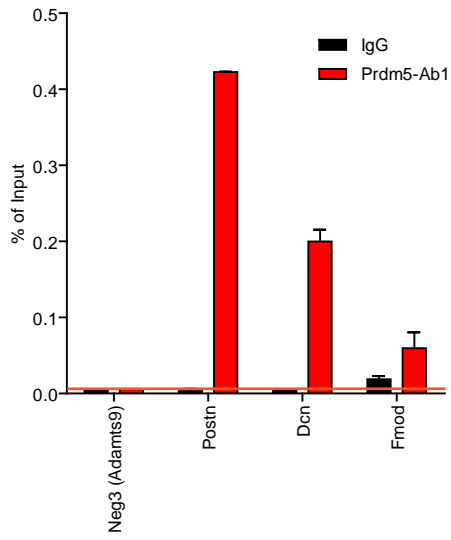

B

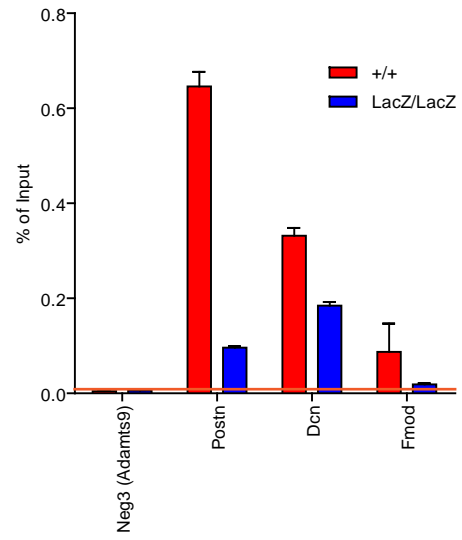

C

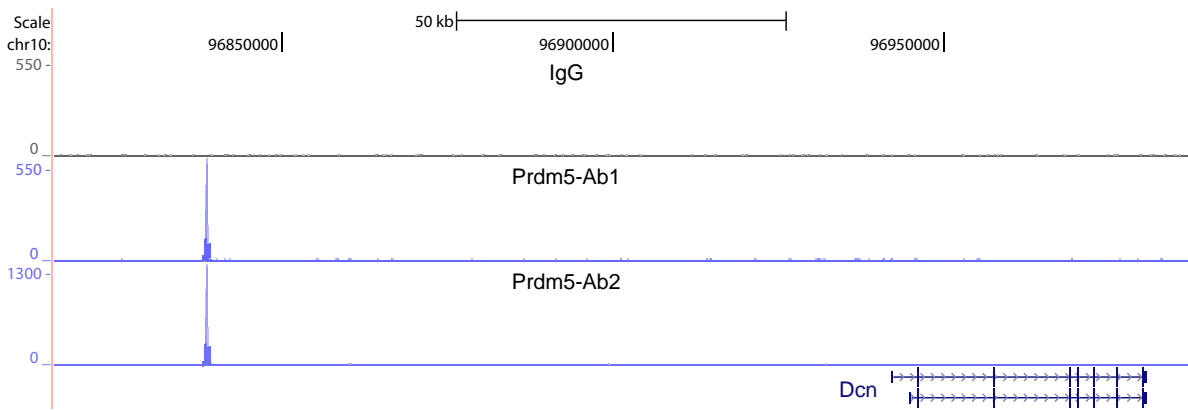

Supplement: pgen.1002711.s005.pdf [file pgen.1002711.s005.pdf]
