# Supplementary material for: Prdm5 Regulates Collagen Gene Transcription by Association with RNA Polymerase II in Developing Bone
Source: PubMed Central journal article supplement (PMC3349747; doi:10.1371/journal.pgen.1002711), 2012-05-10
Supplement: pgen.1002711.s007.pdf [file pgen.1002711.s007.pdf]

## Galli\_Table S1

| Assigned_Ensembl_ID | Chromosome | start_position_(bp) | end_position_(bp) |
|---------------------|------------|---------------------|-------------------|
| ENSMUSG00000062588  | chr1       | 4871837             | 4872254           |
| ENSMUSG00000002459  | chr1       | 5059967             | 5060278           |
| ENSMUSG00000061024  | chr1       | 9535068             | 9535495           |
| ENSMUSG00000025932  | chr1       | 14497004            | 14497547          |
| ENSMUSG00000026158  | chr1       | 23389277            | 23389827          |
| ENSMUSG00000026147  | chr1       | 24204058            | 24204570          |
| ENSMUSG00000026147  | chr1       | 24228155            | 24228950          |
| ENSMUSG00000026147  | chr1       | 24236796            | 24237333          |
| ENSMUSG00000026147  | chr1       | 24237646            | 24238796          |
| ENSMUSG00000026147  | chr1       | 24243848            | 24244404          |
| ENSMUSG00000026147  | chr1       | 24245953            | 24246389          |
| ENSMUSG00000004768  | chr1       | 33776277            | 33776942          |
| ENSMUSG00000042215  | chr1       | 33814124            | 33814767          |
| ENSMUSG00000037470  | chr1       | 36300828            | 36301242          |
| ENSMUSG00000037408  | chr1       | 36528590            | 36529028          |
| ENSMUSG00000026113  | chr1       | 37366832            | 37367441          |
| ENSMUSG00000026110  | chr1       | 37642521            | 37643007          |
| ENSMUSG00000026083  | chr1       | 38054735            | 38055178          |
| ENSMUSG00000026082  | chr1       | 38185841            | 38186368          |
| ENSMUSG00000026082  | chr1       | 38186864            | 38187155          |
| ENSMUSG00000026082  | chr1       | 38196242            | 38196671          |
| ENSMUSG00000026074  | chr1       | 39902860            | 39903449          |
| ENSMUSG00000041763  | chr1       | 43990511            | 43990948          |
| ENSMUSG00000026048  | chr1       | 44204686            | 44205229          |
| ENSMUSG00000026043  | chr1       | 45378425            | 45379172          |
| ENSMUSG00000026043  | chr1       | 45381918            | 45383126          |
| ENSMUSG00000026043  | chr1       | 45383338            | 45383694          |
| ENSMUSG00000026043  | chr1       | 45387156            | 45387639          |
| ENSMUSG00000026043  | chr1       | 45387707            | 45389309          |
| ENSMUSG00000026043  | chr1       | 45389671            | 45389967          |
| ENSMUSG00000026043  | chr1       | 45390167            | 45391773          |
| ENSMUSG00000026043  | chr1       | 45391838            | 45392187          |
| ENSMUSG00000026043  | chr1       | 45393298            | 45393787          |
| ENSMUSG00000026043  | chr1       | 45393948            | 45394490          |
| ENSMUSG00000026043  | chr1       | 45395060            | 45395840          |
| ENSMUSG00000026043  | chr1       | 45396506            | 45398375          |
| ENSMUSG00000026043  | chr1       | 45398664            | 45399493          |
| ENSMUSG00000026043  | chr1       | 45399960            | 45401137          |
| ENSMUSG00000026043  | chr1       | 45401198            | 45402076          |
| ENSMUSG00000026043  | chr1       | 45402536            | 45403047          |
| ENSMUSG00000026042  | chr1       | 45464278            | 45464894          |
| ENSMUSG00000026042  | chr1       | 45474262            | 45474677          |
| ENSMUSG00000026042  | chr1       | 45478576            | 45479603          |
| ENSMUSG00000026042  | chr1       | 45486462            | 45487030          |
| ENSMUSG00000026042  | chr1       | 45491409            | 45492066          |
| ENSMUSG00000084531  | chr1       | 50612043            | 50612359          |
| ENSMUSG00000026107  | chr1       | 51530247            | 51530575          |
| ENSMUSG00000052331  | chr1       | 54896280            | 54896869          |
| ENSMUSG00000025980  | chr1       | 55144552            | 55145126          |
| ENSMUSG00000038331  | chr1       | 57015688            | 57016196          |
| ENSMUSG00000038331  | chr1       | 57030039            | 57030511          |
| ENSMUSG00000038331  | chr1       | 57037885            | 57038491          |
| ENSMUSG00000063558  | chr1       | 58087061            | 58087393          |
| ENSMUSG00000038242  | chr1       | 58267004            | 58267638          |

|                    |      |           |           |
|--------------------|------|-----------|-----------|
| ENSMUSG00000026036 | chr1 | 58501911  | 58502396  |
| ENSMUSG00000041075 | chr1 | 59539725  | 59540142  |
| ENSMUSG00000047361 | chr1 | 59565323  | 59565820  |
| ENSMUSG00000026018 | chr1 | 60079626  | 60079915  |
| ENSMUSG00000026019 | chr1 | 60154692  | 60155564  |
| ENSMUSG00000041003 | chr1 | 60237101  | 60237446  |
| ENSMUSG00000082160 | chr1 | 60669822  | 60670281  |
| ENSMUSG00000046526 | chr1 | 62579235  | 62579532  |
| ENSMUSG00000081617 | chr1 | 62919990  | 62920649  |
| ENSMUSG00000025959 | chr1 | 64168518  | 64168874  |
| ENSMUSG00000045005 | chr1 | 64782836  | 64783223  |
| ENSMUSG00000045005 | chr1 | 64887471  | 64888062  |
| ENSMUSG00000025945 | chr1 | 65794067  | 65794561  |
| ENSMUSG00000084332 | chr1 | 69288442  | 69288852  |
| ENSMUSG00000026176 | chr1 | 74437858  | 74438336  |
| ENSMUSG00000033021 | chr1 | 75432283  | 75432941  |
| ENSMUSG00000082528 | chr1 | 75598077  | 75598683  |
| ENSMUSG00000067158 | chr1 | 82522376  | 82522793  |
| ENSMUSG00000026150 | chr1 | 82677162  | 82677497  |
| ENSMUSG00000026238 | chr1 | 88399527  | 88400067  |
| ENSMUSG00000026240 | chr1 | 88479216  | 88479555  |
| ENSMUSG00000036500 | chr1 | 89021738  | 89022118  |
| ENSMUSG00000026255 | chr1 | 89168980  | 89169542  |
| ENSMUSG00000084195 | chr1 | 90017099  | 90017613  |
| ENSMUSG00000049866 | chr1 | 90597710  | 90598135  |
| ENSMUSG00000056128 | chr1 | 92547723  | 92548168  |
| ENSMUSG00000048126 | chr1 | 92680674  | 92681043  |
| ENSMUSG00000048126 | chr1 | 92681445  | 92682082  |
| ENSMUSG00000048126 | chr1 | 92684583  | 92685085  |
| ENSMUSG00000048126 | chr1 | 92691347  | 92691843  |
| ENSMUSG00000047443 | chr1 | 93265741  | 93266206  |
| ENSMUSG00000026313 | chr1 | 93977506  | 93977967  |
| ENSMUSG00000034220 | chr1 | 94711289  | 94711891  |
| ENSMUSG00000026274 | chr1 | 95239392  | 95240113  |
| ENSMUSG00000026277 | chr1 | 95532394  | 95532999  |
| ENSMUSG00000077413 | chr1 | 96577611  | 96577969  |
| ENSMUSG00000038866 | chr1 | 107783654 | 107783982 |
| ENSMUSG00000067001 | chr1 | 109315402 | 109315772 |
| ENSMUSG00000048402 | chr1 | 120928436 | 120928936 |
| ENSMUSG00000026390 | chr1 | 122382156 | 122382718 |
| ENSMUSG00000001674 | chr1 | 123464210 | 123464758 |
| ENSMUSG00000070689 | chr1 | 128652189 | 128652719 |
| ENSMUSG00000036086 | chr1 | 129999121 | 129999618 |
| ENSMUSG00000080357 | chr1 | 130445562 | 130445990 |
| ENSMUSG00000026427 | chr1 | 133052148 | 133052555 |
| ENSMUSG00000026437 | chr1 | 134036094 | 134036642 |
| ENSMUSG00000079330 | chr1 | 134071514 | 134072119 |
| ENSMUSG00000053024 | chr1 | 134435253 | 134435693 |
| ENSMUSG00000041577 | chr1 | 135862090 | 135862589 |
| ENSMUSG00000041559 | chr1 | 135935901 | 135936607 |
| ENSMUSG00000041559 | chr1 | 135938382 | 135939189 |
| ENSMUSG00000041559 | chr1 | 135939872 | 135940460 |
| ENSMUSG00000042305 | chr1 | 136258496 | 136258895 |
| ENSMUSG00000026456 | chr1 | 136302373 | 136302900 |
| ENSMUSG00000042207 | chr1 | 136453363 | 136453689 |
| ENSMUSG00000077846 | chr1 | 136642042 | 136642640 |
| ENSMUSG00000026424 | chr1 | 137092432 | 137093003 |
| ENSMUSG00000048096 | chr1 | 137220802 | 137221635 |

|                     |       |           |           |
|---------------------|-------|-----------|-----------|
| ENSMUSG00000009418  | chr1  | 137568652 | 137569432 |
| ENSMUSG00000009418  | chr1  | 137583835 | 137584205 |
| ENSMUSG000000073552 | chr1  | 138645540 | 138646211 |
| ENSMUSG000000026398 | chr1  | 138976222 | 138976774 |
| ENSMUSG00000006005  | chr1  | 152239600 | 152240112 |
| ENSMUSG000000043019 | chr1  | 153552908 | 153553648 |
| ENSMUSG000000032666 | chr1  | 153846561 | 153847165 |
| ENSMUSG000000026473 | chr1  | 155746990 | 155747320 |
| ENSMUSG000000050565 | chr1  | 157854909 | 157855184 |
| ENSMUSG000000026592 | chr1  | 159077618 | 159078089 |
| ENSMUSG000000033488 | chr1  | 159366263 | 159366823 |
| ENSMUSG000000073530 | chr1  | 160847139 | 160847783 |
| ENSMUSG000000047661 | chr1  | 160959740 | 160960198 |
| ENSMUSG000000040782 | chr1  | 161163016 | 161163436 |
| ENSMUSG000000053332 | chr1  | 162965189 | 162965703 |
| ENSMUSG000000026586 | chr1  | 165223915 | 165224427 |
| ENSMUSG000000026586 | chr1  | 165242190 | 165242986 |
| ENSMUSG000000040124 | chr1  | 165333611 | 165333996 |
| ENSMUSG000000026585 | chr1  | 165709295 | 165709708 |
| ENSMUSG000000026566 | chr1  | 167572854 | 167573325 |
| ENSMUSG000000026560 | chr1  | 168649366 | 168649907 |
| ENSMUSG000000053664 | chr1  | 169176968 | 169177466 |
| ENSMUSG000000038463 | chr1  | 172575891 | 172576594 |
| ENSMUSG000000038463 | chr1  | 172594879 | 172595727 |
| ENSMUSG000000006403 | chr1  | 173179800 | 173180178 |
| ENSMUSG000000052423 | chr1  | 173192829 | 173193435 |
| ENSMUSG000000003464 | chr1  | 174064184 | 174064575 |
| ENSMUSG000000026500 | chr1  | 180249040 | 180249698 |
| ENSMUSG000000055067 | chr1  | 181406642 | 181407024 |
| ENSMUSG000000055067 | chr1  | 181408040 | 181408582 |
| ENSMUSG000000026491 | chr1  | 181792993 | 181793523 |
| ENSMUSG000000026489 | chr1  | 182098095 | 182098562 |
| ENSMUSG000000066652 | chr1  | 182824792 | 182825149 |
| ENSMUSG000000038776 | chr1  | 182945796 | 182946447 |
| ENSMUSG000000026509 | chr1  | 184430912 | 184431496 |
| ENSMUSG000000079164 | chr1  | 184886693 | 184887114 |
| ENSMUSG000000039384 | chr1  | 185860051 | 185860665 |
| ENSMUSG000000001305 | chr1  | 188573050 | 188573424 |
| ENSMUSG000000039210 | chr1  | 189102805 | 189103087 |
| ENSMUSG000000026604 | chr1  | 191641010 | 191641432 |
| ENSMUSG000000084434 | chr1  | 192349481 | 192349857 |
| ENSMUSG000000037568 | chr1  | 192802147 | 192802938 |
| ENSMUSG000000062510 | chr1  | 192887676 | 192888115 |
| ENSMUSG000000026627 | chr1  | 193149591 | 193149894 |
| ENSMUSG000000026622 | chr1  | 193650443 | 193651007 |
| ENSMUSG000000037375 | chr1  | 194607439 | 194607858 |
| ENSMUSG000000037375 | chr1  | 194615241 | 194615670 |
| ENSMUSG000000065533 | chr1  | 195395432 | 195396008 |
| ENSMUSG000000016481 | chr1  | 196957031 | 196957644 |
| ENSMUSG000000065792 | chr10 | 6267091   | 6267469   |
| ENSMUSG000000019796 | chr10 | 7320203   | 7320656   |
| ENSMUSG000000015755 | chr10 | 7636609   | 7637186   |
| ENSMUSG000000015755 | chr10 | 7710260   | 7710491   |
| ENSMUSG000000019832 | chr10 | 10277701  | 10278242  |
| ENSMUSG000000064531 | chr10 | 13635179  | 13635686  |
| ENSMUSG000000019850 | chr10 | 18721763  | 18722290  |
| ENSMUSG000000071369 | chr10 | 19696831  | 19697440  |
| ENSMUSG000000053219 | chr10 | 21928563  | 21929182  |

|                    |       |          |          |
|--------------------|-------|----------|----------|
| ENSMUSG00000075295 | chr10 | 22118695 | 22119381 |
| ENSMUSG00000010461 | chr10 | 23216119 | 23216513 |
| ENSMUSG00000061983 | chr10 | 23507068 | 23507470 |
| ENSMUSG00000081259 | chr10 | 24288090 | 24288575 |
| ENSMUSG00000019791 | chr10 | 30338122 | 30338596 |
| ENSMUSG00000039462 | chr10 | 34113822 | 34115536 |
| ENSMUSG00000077576 | chr10 | 37805280 | 37805663 |
| ENSMUSG00000019846 | chr10 | 38606322 | 38606813 |
| ENSMUSG00000019843 | chr10 | 39011537 | 39011879 |
| ENSMUSG00000045555 | chr10 | 40402849 | 40403474 |
| ENSMUSG00000075216 | chr10 | 41923042 | 41923423 |
| ENSMUSG00000019802 | chr10 | 42481907 | 42482399 |
| ENSMUSG00000038151 | chr10 | 44249020 | 44249524 |
| ENSMUSG00000019857 | chr10 | 53315586 | 53315988 |
| ENSMUSG00000038122 | chr10 | 55856562 | 55857018 |
| ENSMUSG00000003226 | chr10 | 57909328 | 57909786 |
| ENSMUSG00000020109 | chr10 | 59350366 | 59350729 |
| ENSMUSG00000020108 | chr10 | 59413372 | 59413812 |
| ENSMUSG00000077843 | chr10 | 59692962 | 59693434 |
| ENSMUSG00000020101 | chr10 | 59817380 | 59817995 |
| ENSMUSG00000020100 | chr10 | 60224949 | 60225321 |
| ENSMUSG00000020097 | chr10 | 60609899 | 60610352 |
| ENSMUSG00000020092 | chr10 | 60837593 | 60838127 |
| ENSMUSG00000020086 | chr10 | 61325578 | 61326025 |
| ENSMUSG00000058806 | chr10 | 61356522 | 61356814 |
| ENSMUSG00000058806 | chr10 | 61435538 | 61435893 |
| ENSMUSG00000042846 | chr10 | 63552695 | 63553265 |
| ENSMUSG00000075004 | chr10 | 66398527 | 66398945 |
| ENSMUSG00000075004 | chr10 | 66465064 | 66465543 |
| ENSMUSG00000037846 | chr10 | 67446546 | 67447055 |
| ENSMUSG00000069601 | chr10 | 68998140 | 68998630 |
| ENSMUSG00000033444 | chr10 | 74675036 | 74675424 |
| ENSMUSG00000046807 | chr10 | 75013742 | 75014252 |
| ENSMUSG00000033208 | chr10 | 75720535 | 75721044 |
| ENSMUSG00000020241 | chr10 | 76070284 | 76071143 |
| ENSMUSG00000020241 | chr10 | 76071757 | 76072371 |
| ENSMUSG00000020241 | chr10 | 76073071 | 76073643 |
| ENSMUSG00000020241 | chr10 | 76096580 | 76097176 |
| ENSMUSG00000020241 | chr10 | 76111627 | 76112019 |
| ENSMUSG00000020241 | chr10 | 76127789 | 76128224 |
| ENSMUSG00000001119 | chr10 | 76177674 | 76178318 |
| ENSMUSG00000001119 | chr10 | 76179137 | 76180948 |
| ENSMUSG00000001119 | chr10 | 76183617 | 76183958 |
| ENSMUSG00000020262 | chr10 | 76881021 | 76881589 |
| ENSMUSG00000032788 | chr10 | 77921316 | 77921838 |
| ENSMUSG00000020317 | chr10 | 79047233 | 79047819 |
| ENSMUSG00000020308 | chr10 | 79132189 | 79132786 |
| ENSMUSG00000003068 | chr10 | 79580244 | 79580654 |
| ENSMUSG00000045193 | chr10 | 79621285 | 79621897 |
| ENSMUSG00000045193 | chr10 | 79626403 | 79626936 |
| ENSMUSG00000045193 | chr10 | 79627666 | 79628066 |
| ENSMUSG00000020135 | chr10 | 79757459 | 79757948 |
| ENSMUSG00000020190 | chr10 | 80139220 | 80139725 |
| ENSMUSG00000020219 | chr10 | 80362961 | 80363671 |
| ENSMUSG00000035011 | chr10 | 80598457 | 80599034 |
| ENSMUSG00000004934 | chr10 | 80624641 | 80625211 |
| ENSMUSG00000079936 | chr10 | 80874257 | 80874850 |
| ENSMUSG00000034771 | chr10 | 81035163 | 81035852 |

|                    |       |           |           |
|--------------------|-------|-----------|-----------|
| ENSMUSG00000074860 | chr10 | 81106414  | 81106797  |
| ENSMUSG00000078437 | chr10 | 81233581  | 81234170  |
| ENSMUSG00000034674 | chr10 | 82093225  | 82093778  |
| ENSMUSG00000020263 | chr10 | 83071362  | 83071832  |
| ENSMUSG00000020048 | chr10 | 86168165  | 86169101  |
| ENSMUSG00000035459 | chr10 | 86546927  | 86547405  |
| ENSMUSG00000078109 | chr10 | 89335184  | 89335575  |
| ENSMUSG00000019961 | chr10 | 90631332  | 90631683  |
| ENSMUSG00000019961 | chr10 | 90633256  | 90633695  |
| ENSMUSG00000019961 | chr10 | 90703949  | 90704425  |
| ENSMUSG00000008398 | chr10 | 92824219  | 92824911  |
| ENSMUSG00000020019 | chr10 | 93129810  | 93130169  |
| ENSMUSG00000020023 | chr10 | 93956875  | 93957496  |
| ENSMUSG00000074785 | chr10 | 94415149  | 94415377  |
| ENSMUSG00000019929 | chr10 | 96838326  | 96839043  |
| ENSMUSG00000047025 | chr10 | 97132799  | 97133340  |
| ENSMUSG00000058799 | chr10 | 110910709 | 110911027 |
| ENSMUSG00000020137 | chr10 | 114821427 | 114822054 |
| ENSMUSG00000052681 | chr10 | 117284374 | 117284813 |
| ENSMUSG00000020114 | chr10 | 118677273 | 118677714 |
| ENSMUSG00000056758 | chr10 | 120019484 | 120019889 |
| ENSMUSG00000056758 | chr10 | 120047179 | 120047586 |
| ENSMUSG00000020105 | chr10 | 125402846 | 125403394 |
| ENSMUSG00000019467 | chr10 | 126626059 | 126626534 |
| ENSMUSG00000025417 | chr10 | 126665987 | 126666439 |
| ENSMUSG00000025409 | chr10 | 126721851 | 126722327 |
| ENSMUSG00000040249 | chr10 | 127052421 | 127052925 |
| ENSMUSG00000040043 | chr10 | 127588045 | 127588347 |
| ENSMUSG00000005683 | chr10 | 127774816 | 127775159 |
| ENSMUSG00000039810 | chr10 | 127984646 | 127985265 |
| ENSMUSG00000018166 | chr10 | 128021907 | 128022336 |
| ENSMUSG00000047090 | chr10 | 128240853 | 128241456 |
| ENSMUSG00000045559 | chr10 | 129665366 | 129665644 |
| ENSMUSG00000048807 | chr11 | 3812847   | 3813486   |
| ENSMUSG00000034412 | chr11 | 4097645   | 4098316   |
| ENSMUSG00000034164 | chr11 | 5028676   | 5029313   |
| ENSMUSG00000020393 | chr11 | 5190149   | 5190710   |
| ENSMUSG00000083108 | chr11 | 5550562   | 5551022   |
| ENSMUSG00000020473 | chr11 | 5762747   | 5763296   |
| ENSMUSG00000057897 | chr11 | 5970839   | 5971475   |
| ENSMUSG00000057897 | chr11 | 5971612   | 5972156   |
| ENSMUSG00000083553 | chr11 | 8415332   | 8415643   |
| ENSMUSG00000020422 | chr11 | 8429849   | 8430346   |
| ENSMUSG00000020422 | chr11 | 8439647   | 8440688   |
| ENSMUSG00000035455 | chr11 | 11726920  | 11727358  |
| ENSMUSG00000020173 | chr11 | 12364121  | 12364619  |
| ENSMUSG00000020122 | chr11 | 16666371  | 16666879  |
| ENSMUSG00000044966 | chr11 | 16835612  | 16836074  |
| ENSMUSG00000000581 | chr11 | 17157361  | 17157888  |
| ENSMUSG00000044066 | chr11 | 20129252  | 20129733  |
| ENSMUSG00000084252 | chr11 | 20572331  | 20572981  |
| ENSMUSG00000051650 | chr11 | 22759739  | 22760262  |
| ENSMUSG00000007739 | chr11 | 22890337  | 22890755  |
| ENSMUSG00000032673 | chr11 | 29414508  | 29414940  |
| ENSMUSG00000020287 | chr11 | 32124516  | 32125017  |
| ENSMUSG00000020272 | chr11 | 32484998  | 32485466  |
| ENSMUSG00000081254 | chr11 | 32807358  | 32807811  |
| ENSMUSG00000082587 | chr11 | 37801903  | 37802138  |

|                    |       |          |          |
|--------------------|-------|----------|----------|
| ENSMUSG00000083806 | chr11 | 39760820 | 39761293 |
| ENSMUSG00000044847 | chr11 | 45757757 | 45758164 |
| ENSMUSG00000020411 | chr11 | 45977226 | 45977674 |
| ENSMUSG00000036644 | chr11 | 49959516 | 49960100 |
| ENSMUSG00000007850 | chr11 | 50190428 | 50191009 |
| ENSMUSG00000036545 | chr11 | 50415728 | 50416584 |
| ENSMUSG00000036545 | chr11 | 50440791 | 50441159 |
| ENSMUSG00000020359 | chr11 | 51382775 | 51383232 |
| ENSMUSG00000020359 | chr11 | 51384410 | 51384890 |
| ENSMUSG00000007777 | chr11 | 51515576 | 51515855 |
| ENSMUSG00000020387 | chr11 | 51706692 | 51707143 |
| ENSMUSG00000018899 | chr11 | 53575239 | 53575764 |
| ENSMUSG00000018899 | chr11 | 53583523 | 53583945 |
| ENSMUSG00000035992 | chr11 | 54253287 | 54253834 |
| ENSMUSG00000018340 | chr11 | 54853085 | 54853647 |
| ENSMUSG00000082257 | chr11 | 55203027 | 55204471 |
| ENSMUSG00000018593 | chr11 | 55241547 | 55242054 |
| ENSMUSG00000020519 | chr11 | 57614205 | 57614979 |
| ENSMUSG00000020515 | chr11 | 57917980 | 57918374 |
| ENSMUSG00000037243 | chr11 | 58115221 | 58115693 |
| ENSMUSG00000049755 | chr11 | 58136685 | 58137371 |
| ENSMUSG00000020496 | chr11 | 58752108 | 58752700 |
| ENSMUSG00000009900 | chr11 | 59107059 | 59107591 |
| ENSMUSG00000082148 | chr11 | 60115336 | 60115779 |
| ENSMUSG00000020536 | chr11 | 60512718 | 60513421 |
| ENSMUSG00000002814 | chr11 | 60590584 | 60591081 |
| ENSMUSG00000043284 | chr11 | 60692219 | 60692849 |
| ENSMUSG00000042506 | chr11 | 60988940 | 60989226 |
| ENSMUSG00000001036 | chr11 | 61413713 | 61414192 |
| ENSMUSG00000083212 | chr11 | 61833992 | 61834785 |
| ENSMUSG00000042200 | chr11 | 62780337 | 62781111 |
| ENSMUSG00000020542 | chr11 | 65200031 | 65200507 |
| ENSMUSG00000077908 | chr11 | 68178055 | 68178578 |
| ENSMUSG00000020897 | chr11 | 68858971 | 68859458 |
| ENSMUSG00000059278 | chr11 | 69209131 | 69209935 |
| ENSMUSG00000018476 | chr11 | 69228704 | 69229039 |
| ENSMUSG00000005237 | chr11 | 69361707 | 69362244 |
| ENSMUSG00000018752 | chr11 | 69508948 | 69509302 |
| ENSMUSG00000047284 | chr11 | 69716003 | 69716380 |
| ENSMUSG00000018293 | chr11 | 70466696 | 70467078 |
| ENSMUSG00000018446 | chr11 | 70796218 | 70797099 |
| ENSMUSG00000077456 | chr11 | 71683350 | 71684037 |
| ENSMUSG00000020794 | chr11 | 72419928 | 72420357 |
| ENSMUSG00000038351 | chr11 | 74710741 | 74711128 |
| ENSMUSG00000020850 | chr11 | 75300290 | 75300780 |
| ENSMUSG00000020847 | chr11 | 75779852 | 75780228 |
| ENSMUSG00000080763 | chr11 | 76285966 | 76286426 |
| ENSMUSG00000037857 | chr11 | 77499247 | 77499591 |
| ENSMUSG00000017453 | chr11 | 77711917 | 77712413 |
| ENSMUSG00000002058 | chr11 | 78157394 | 78157732 |
| ENSMUSG00000017686 | chr11 | 80022645 | 80023199 |
| ENSMUSG00000035441 | chr11 | 80470151 | 80470760 |
| ENSMUSG00000020702 | chr11 | 82008438 | 82008874 |
| ENSMUSG00000020696 | chr11 | 82670399 | 82670918 |
| ENSMUSG00000018068 | chr11 | 86070735 | 86071306 |
| ENSMUSG00000047126 | chr11 | 86570923 | 86571301 |
| ENSMUSG00000023723 | chr11 | 87977704 | 87978791 |
| ENSMUSG00000023723 | chr11 | 87979085 | 87979444 |

|                    |       |           |           |
|--------------------|-------|-----------|-----------|
| ENSMUSG00000023723 | chr11 | 87993783  | 87994139  |
| ENSMUSG00000023723 | chr11 | 87994176  | 87994572  |
| ENSMUSG00000034031 | chr11 | 88105291  | 88105595  |
| ENSMUSG00000078718 | chr11 | 90216290  | 90217281  |
| ENSMUSG00000037573 | chr11 | 94022625  | 94023112  |
| ENSMUSG00000020864 | chr11 | 94189391  | 94189936  |
| ENSMUSG00000064512 | chr11 | 94776955  | 94777507  |
| ENSMUSG00000001506 | chr11 | 94798834  | 94812998  |
| ENSMUSG00000038994 | chr11 | 94813180  | 94813960  |
| ENSMUSG00000038994 | chr11 | 94814632  | 94815147  |
| ENSMUSG00000038994 | chr11 | 94815592  | 94817189  |
| ENSMUSG00000038994 | chr11 | 94818806  | 94819245  |
| ENSMUSG00000038976 | chr11 | 94855156  | 94855795  |
| ENSMUSG00000020871 | chr11 | 95007357  | 95007780  |
| ENSMUSG00000000120 | chr11 | 95434314  | 95434699  |
| ENSMUSG00000075595 | chr11 | 95574680  | 95575111  |
| ENSMUSG00000050860 | chr11 | 95669603  | 95670099  |
| ENSMUSG00000018381 | chr11 | 95718606  | 95719123  |
| ENSMUSG00000018381 | chr11 | 95720301  | 95720763  |
| ENSMUSG00000047653 | chr11 | 95824491  | 95824951  |
| ENSMUSG00000013415 | chr11 | 95868559  | 95869006  |
| ENSMUSG00000056648 | chr11 | 96138911  | 96139306  |
| ENSMUSG00000018678 | chr11 | 96854378  | 96854948  |
| ENSMUSG00000049807 | chr11 | 97301831  | 97302278  |
| ENSMUSG00000018537 | chr11 | 97556959  | 97557448  |
| ENSMUSG00000038366 | chr11 | 97662103  | 97662564  |
| ENSMUSG00000017195 | chr11 | 98412139  | 98412563  |
| ENSMUSG00000017221 | chr11 | 98544127  | 98544757  |
| ENSMUSG00000037992 | chr11 | 98793958  | 98794334  |
| ENSMUSG00000037992 | chr11 | 98797868  | 98798374  |
| ENSMUSG00000064491 | chr11 | 98802138  | 98802482  |
| ENSMUSG00000035592 | chr11 | 99873033  | 99873637  |
| ENSMUSG00000057723 | chr11 | 99885975  | 99886480  |
| ENSMUSG00000043485 | chr11 | 99899352  | 99899936  |
| ENSMUSG00000048981 | chr11 | 99908697  | 99909319  |
| ENSMUSG00000048013 | chr11 | 99954044  | 99954600  |
| ENSMUSG00000053654 | chr11 | 100151659 | 100152002 |
| ENSMUSG00000006931 | chr11 | 100275517 | 100276243 |
| ENSMUSG00000019173 | chr11 | 100599435 | 100599997 |
| ENSMUSG00000004044 | chr11 | 100830183 | 100830523 |
| ENSMUSG00000004044 | chr11 | 100831209 | 100831670 |
| ENSMUSG00000001751 | chr11 | 100930908 | 100931630 |
| ENSMUSG00000035198 | chr11 | 100981908 | 100982470 |
| ENSMUSG00000059995 | chr11 | 102158370 | 102159037 |
| ENSMUSG00000034664 | chr11 | 102328496 | 102328933 |
| ENSMUSG00000050288 | chr11 | 102467309 | 102467676 |
| ENSMUSG00000020936 | chr11 | 102919883 | 102920427 |
| ENSMUSG00000048878 | chr11 | 102976586 | 102977021 |
| ENSMUSG00000020681 | chr11 | 105835769 | 105836326 |
| ENSMUSG00000040481 | chr11 | 106992620 | 106992878 |
| ENSMUSG00000077836 | chr11 | 113061892 | 113062239 |
| ENSMUSG00000034706 | chr11 | 114586127 | 114586808 |
| ENSMUSG00000034586 | chr11 | 115219699 | 115220271 |
| ENSMUSG00000084277 | chr11 | 115527994 | 115528425 |
| ENSMUSG00000020773 | chr11 | 115971238 | 115971686 |
| ENSMUSG00000020806 | chr11 | 116482470 | 116482931 |
| ENSMUSG00000075410 | chr11 | 116513531 | 116514026 |
| ENSMUSG00000020810 | chr11 | 116518938 | 116519661 |

|                    |       |           |           |
|--------------------|-------|-----------|-----------|
| ENSMUSG00000059248 | chr11 | 117094292 | 117095241 |
| ENSMUSG00000059248 | chr11 | 117117237 | 117117912 |
| ENSMUSG00000054418 | chr11 | 117418535 | 117419063 |
| ENSMUSG00000082562 | chr11 | 117773939 | 117774396 |
| ENSMUSG00000053113 | chr11 | 117829324 | 117830087 |
| ENSMUSG00000033909 | chr11 | 118151154 | 118151747 |
| ENSMUSG00000076433 | chr11 | 118207269 | 118207691 |
| ENSMUSG00000017466 | chr11 | 118214665 | 118215153 |
| ENSMUSG00000025577 | chr11 | 118884412 | 118884868 |
| ENSMUSG00000025578 | chr11 | 118914527 | 118914878 |
| ENSMUSG00000025372 | chr11 | 119810111 | 119810564 |
| ENSMUSG00000025379 | chr11 | 120012409 | 120012760 |
| ENSMUSG00000056649 | chr11 | 120047259 | 120047796 |
| ENSMUSG00000075389 | chr11 | 120051280 | 120051788 |
| ENSMUSG00000039741 | chr11 | 120112151 | 120112743 |
| ENSMUSG00000039741 | chr11 | 120113730 | 120114315 |
| ENSMUSG00000062825 | chr11 | 120207900 | 120209267 |
| ENSMUSG00000062825 | chr11 | 120209310 | 120209853 |
| ENSMUSG00000039450 | chr11 | 120588121 | 120588609 |
| ENSMUSG00000025153 | chr11 | 120685676 | 120686086 |
| ENSMUSG00000025173 | chr11 | 121215498 | 121215908 |
| ENSMUSG00000025173 | chr11 | 121216175 | 121216640 |
| ENSMUSG00000020635 | chr12 | 4848260   | 4848851   |
| ENSMUSG00000054459 | chr12 | 11392222  | 11392542  |
| ENSMUSG00000073228 | chr12 | 13280784  | 13281106  |
| ENSMUSG00000020580 | chr12 | 16877752  | 16878238  |
| ENSMUSG00000061458 | chr12 | 17345197  | 17345666  |
| ENSMUSG00000020649 | chr12 | 25393126  | 25393499  |
| ENSMUSG00000020674 | chr12 | 30596538  | 30597020  |
| ENSMUSG00000002900 | chr12 | 31954430  | 31954864  |
| ENSMUSG00000020659 | chr12 | 32184282  | 32185026  |
| ENSMUSG00000056899 | chr12 | 41514879  | 41515334  |
| ENSMUSG00000054302 | chr12 | 55796272  | 55796767  |
| ENSMUSG00000079104 | chr12 | 58331383  | 58331890  |
| ENSMUSG00000020993 | chr12 | 60162163  | 60162626  |
| ENSMUSG00000048285 | chr12 | 71899374  | 71899845  |
| ENSMUSG00000056359 | chr12 | 74563014  | 74563362  |
| ENSMUSG00000052609 | chr12 | 77634024  | 77634574  |
| ENSMUSG00000021114 | chr12 | 79962168  | 79962790  |
| ENSMUSG00000021127 | chr12 | 81212616  | 81213027  |
| ENSMUSG00000015143 | chr12 | 81361234  | 81361610  |
| ENSMUSG00000065115 | chr12 | 81978997  | 81979346  |
| ENSMUSG00000021136 | chr12 | 82200180  | 82200601  |
| ENSMUSG00000042700 | chr12 | 83348784  | 83349101  |
| ENSMUSG00000021245 | chr12 | 86603455  | 86603795  |
| ENSMUSG00000034168 | chr12 | 88223732  | 88224300  |
| ENSMUSG00000034157 | chr12 | 88287921  | 88288324  |
| ENSMUSG00000033713 | chr12 | 100770388 | 100770879 |
| ENSMUSG00000021070 | chr12 | 106737357 | 106737912 |
| ENSMUSG00000072840 | chr12 | 109492899 | 109493187 |
| ENSMUSG00000021265 | chr12 | 110070454 | 110070894 |
| ENSMUSG00000078977 | chr12 | 111619143 | 111619596 |
| ENSMUSG00000018707 | chr12 | 111840975 | 111841463 |
| ENSMUSG00000037896 | chr12 | 112278202 | 112278476 |
| ENSMUSG00000021277 | chr12 | 112406052 | 112406401 |
| ENSMUSG00000037679 | chr12 | 113831357 | 113831770 |
| ENSMUSG00000021144 | chr12 | 114338713 | 114339337 |
| ENSMUSG00000006356 | chr12 | 114376781 | 114377242 |



|                    |       |           |           |
|--------------------|-------|-----------|-----------|
| ENSMUSG00000042050 | chr12 | 117501009 | 117501523 |
| ENSMUSG00000021171 | chr12 | 117518950 | 117519449 |
| ENSMUSG00000021147 | chr13 | 8869809   | 8870358   |
| ENSMUSG00000057069 | chr13 | 12669214  | 12669686  |
| ENSMUSG00000070172 | chr13 | 16852838  | 16853136  |
| ENSMUSG00000022228 | chr13 | 21545161  | 21545918  |
| ENSMUSG00000060832 | chr13 | 21826900  | 21827449  |
| ENSMUSG00000052565 | chr13 | 23646975  | 23647544  |
| ENSMUSG00000036181 | chr13 | 23830778  | 23831294  |
| ENSMUSG00000021337 | chr13 | 24114254  | 24114767  |
| ENSMUSG00000021357 | chr13 | 31065318  | 31066153  |
| ENSMUSG00000021400 | chr13 | 32893415  | 32893869  |
| ENSMUSG00000021411 | chr13 | 34720602  | 34721071  |
| ENSMUSG00000039087 | chr13 | 37808159  | 37808555  |
| ENSMUSG00000038982 | chr13 | 38694870  | 38695362  |
| ENSMUSG00000021359 | chr13 | 40825050  | 40825421  |
| ENSMUSG00000021364 | chr13 | 41344687  | 41345301  |
| ENSMUSG00000046876 | chr13 | 45878617  | 45879113  |
| ENSMUSG00000021379 | chr13 | 48357289  | 48357853  |
| ENSMUSG00000038025 | chr13 | 48967509  | 48967957  |
| ENSMUSG00000037960 | chr13 | 49309007  | 49309569  |
| ENSMUSG00000021448 | chr13 | 51692476  | 51692782  |
| ENSMUSG00000021464 | chr13 | 53252561  | 53252954  |
| ENSMUSG00000021464 | chr13 | 53411740  | 53412336  |
| ENSMUSG00000034928 | chr13 | 54795624  | 54796089  |
| ENSMUSG00000005320 | chr13 | 55269105  | 55269605  |
| ENSMUSG00000021488 | chr13 | 55290881  | 55291335  |
| ENSMUSG00000021485 | chr13 | 55430565  | 55431033  |
| ENSMUSG00000034675 | chr13 | 55584628  | 55585268  |
| ENSMUSG00000021493 | chr13 | 55612159  | 55612831  |
| ENSMUSG00000035367 | chr13 | 58501748  | 58502363  |
| ENSMUSG00000065599 | chr13 | 63343000  | 63343337  |
| ENSMUSG00000065599 | chr13 | 63362203  | 63362712  |
| ENSMUSG00000065599 | chr13 | 63389380  | 63389835  |
| ENSMUSG00000021466 | chr13 | 63753442  | 63753880  |
| ENSMUSG00000001504 | chr13 | 72764989  | 72765456  |
| ENSMUSG00000021608 | chr13 | 73558195  | 73558648  |
| ENSMUSG00000021608 | chr13 | 73595806  | 73596303  |
| ENSMUSG00000021579 | chr13 | 74501082  | 74501527  |
| ENSMUSG00000021591 | chr13 | 75970987  | 75971362  |
| ENSMUSG00000021619 | chr13 | 91312822  | 91313311  |
| ENSMUSG00000021619 | chr13 | 91313319  | 91314090  |
| ENSMUSG00000021619 | chr13 | 91314554  | 91315073  |
| ENSMUSG00000021619 | chr13 | 91363574  | 91363838  |
| ENSMUSG00000014850 | chr13 | 93127423  | 93127767  |
| ENSMUSG00000021684 | chr13 | 95994371  | 95994820  |
| ENSMUSG00000048376 | chr13 | 96426558  | 96426987  |
| ENSMUSG00000021670 | chr13 | 97434883  | 97435334  |
| ENSMUSG00000021662 | chr13 | 98976396  | 98976727  |
| ENSMUSG00000021709 | chr13 | 104709227 | 104709589 |
| ENSMUSG00000049233 | chr13 | 108274330 | 108274765 |
| ENSMUSG00000032846 | chr13 | 108615109 | 108615677 |
| ENSMUSG00000021699 | chr13 | 109316757 | 109317247 |
| ENSMUSG00000067122 | chr13 | 112368142 | 112368658 |
| ENSMUSG00000021754 | chr13 | 112583109 | 112583476 |
| ENSMUSG00000021754 | chr13 | 112599325 | 112599644 |
| ENSMUSG00000016018 | chr13 | 113717439 | 113717853 |
| ENSMUSG00000057445 | chr14 | 6011829   | 6012202   |

|                    |       |           |           |
|--------------------|-------|-----------|-----------|
| ENSMUSG00000079370 | chr14 | 6354730   | 6355134   |
| ENSMUSG00000021785 | chr14 | 17081605  | 17082128  |
| ENSMUSG00000021809 | chr14 | 21113530  | 21114137  |
| ENSMUSG00000039357 | chr14 | 21514401  | 21514723  |
| ENSMUSG00000021819 | chr14 | 21526233  | 21526684  |
| ENSMUSG00000021820 | chr14 | 21611011  | 21611441  |
| ENSMUSG00000021767 | chr14 | 22343149  | 22344094  |
| ENSMUSG00000007817 | chr14 | 26277479  | 26277974  |
| ENSMUSG00000057293 | chr14 | 26554480  | 26555061  |
| ENSMUSG00000057293 | chr14 | 26569090  | 26569595  |
| ENSMUSG00000072678 | chr14 | 26758336  | 26758893  |
| ENSMUSG00000072676 | chr14 | 26898211  | 26898661  |
| ENSMUSG00000040760 | chr14 | 27782959  | 27783314  |
| ENSMUSG00000021962 | chr14 | 31292796  | 31293159  |
| ENSMUSG00000006522 | chr14 | 31744110  | 31744666  |
| ENSMUSG00000021892 | chr14 | 32249110  | 32249626  |
| ENSMUSG00000041408 | chr14 | 35486660  | 35487048  |
| ENSMUSG00000037833 | chr14 | 41730959  | 41731654  |
| ENSMUSG00000021795 | chr14 | 41989653  | 41989909  |
| ENSMUSG00000036339 | chr14 | 49066264  | 49066761  |
| ENSMUSG00000049295 | chr14 | 52638890  | 52639584  |
| ENSMUSG00000053754 | chr14 | 52876881  | 52877633  |
| ENSMUSG00000021982 | chr14 | 60216533  | 60217138  |
| ENSMUSG00000021928 | chr14 | 61979000  | 61979399  |
| ENSMUSG00000021929 | chr14 | 62058569  | 62059021  |
| ENSMUSG00000065459 | chr14 | 62300899  | 62301225  |
| ENSMUSG00000060012 | chr14 | 65270931  | 65271351  |
| ENSMUSG00000055404 | chr14 | 66539602  | 66540202  |
| ENSMUSG00000022040 | chr14 | 66730557  | 66731099  |
| ENSMUSG00000022043 | chr14 | 66915863  | 66916531  |
| ENSMUSG00000022052 | chr14 | 67739100  | 67739698  |
| ENSMUSG00000022091 | chr14 | 70604806  | 70605288  |
| ENSMUSG00000047911 | chr14 | 71096215  | 71096508  |
| ENSMUSG00000022105 | chr14 | 73725921  | 73726362  |
| ENSMUSG00000021996 | chr14 | 75132101  | 75132636  |
| ENSMUSG00000065799 | chr14 | 76384803  | 76385479  |
| ENSMUSG00000022010 | chr14 | 76815964  | 76816450  |
| ENSMUSG00000052584 | chr14 | 77161705  | 77162065  |
| ENSMUSG00000034795 | chr14 | 77483412  | 77484017  |
| ENSMUSG00000022025 | chr14 | 80060763  | 80061516  |
| ENSMUSG00000033166 | chr14 | 99543240  | 99543822  |
| ENSMUSG00000063410 | chr14 | 121777453 | 121777682 |
| ENSMUSG00000022148 | chr15 | 6514983   | 6515537   |
| ENSMUSG00000022148 | chr15 | 6529892   | 6530356   |
| ENSMUSG00000048424 | chr15 | 8824827   | 8825337   |
| ENSMUSG00000022253 | chr15 | 8968544   | 8968986   |
| ENSMUSG00000022246 | chr15 | 10609388  | 10609999  |
| ENSMUSG00000058914 | chr15 | 10887609  | 10888042  |
| ENSMUSG00000047497 | chr15 | 11047856  | 11048315  |
| ENSMUSG00000047497 | chr15 | 11132749  | 11133250  |
| ENSMUSG00000022200 | chr15 | 12251364  | 12252074  |
| ENSMUSG00000022261 | chr15 | 32708374  | 32708866  |
| ENSMUSG00000039007 | chr15 | 33151398  | 33151964  |
| ENSMUSG00000058600 | chr15 | 34372586  | 34372992  |
| ENSMUSG00000022283 | chr15 | 36539163  | 36539426  |
| ENSMUSG00000022312 | chr15 | 51686574  | 51686813  |
| ENSMUSG00000022371 | chr15 | 55141908  | 55142468  |
| ENSMUSG00000049155 | chr15 | 55303083  | 55303438  |

|                    |       |          |          |
|--------------------|-------|----------|----------|
| ENSMUSG00000049155 | chr15 | 55328762 | 55329365 |
| ENSMUSG00000051225 | chr15 | 57807810 | 57808401 |
| ENSMUSG00000022360 | chr15 | 57966413 | 57966865 |
| ENSMUSG00000032501 | chr15 | 59374847 | 59375329 |
| ENSMUSG00000072566 | chr15 | 61875316 | 61875667 |
| ENSMUSG00000072566 | chr15 | 61956632 | 61956955 |
| ENSMUSG00000056590 | chr15 | 62400520 | 62401173 |
| ENSMUSG00000053469 | chr15 | 66507128 | 66507550 |
| ENSMUSG00000005124 | chr15 | 66723402 | 66725267 |
| ENSMUSG00000005124 | chr15 | 66731009 | 66731540 |
| ENSMUSG00000013846 | chr15 | 67006775 | 67007340 |
| ENSMUSG00000045567 | chr15 | 71638214 | 71638661 |
| ENSMUSG00000045567 | chr15 | 71678690 | 71679168 |
| ENSMUSG00000079022 | chr15 | 71720745 | 71721241 |
| ENSMUSG00000079022 | chr15 | 71728107 | 71728637 |
| ENSMUSG00000036661 | chr15 | 73366085 | 73366552 |
| ENSMUSG00000084493 | chr15 | 73555533 | 73555971 |
| ENSMUSG00000034730 | chr15 | 74326141 | 74326562 |
| ENSMUSG00000044276 | chr15 | 74539366 | 74540255 |
| ENSMUSG00000022579 | chr15 | 75412162 | 75412797 |
| ENSMUSG00000022574 | chr15 | 75724442 | 75724787 |
| ENSMUSG00000022570 | chr15 | 75760164 | 75760522 |
| ENSMUSG00000022568 | chr15 | 75899332 | 75899859 |
| ENSMUSG00000022568 | chr15 | 75900002 | 75900510 |
| ENSMUSG00000022565 | chr15 | 76018985 | 76019402 |
| ENSMUSG00000022565 | chr15 | 76036397 | 76036813 |
| ENSMUSG00000033565 | chr15 | 77160139 | 77160587 |
| ENSMUSG00000049521 | chr15 | 78673650 | 78674082 |
| ENSMUSG00000049521 | chr15 | 78678942 | 78679436 |
| ENSMUSG00000033088 | chr15 | 78772994 | 78773479 |
| ENSMUSG00000075558 | chr15 | 78826366 | 78826851 |
| ENSMUSG00000075558 | chr15 | 78831830 | 78832272 |
| ENSMUSG00000022428 | chr15 | 79489482 | 79490081 |
| ENSMUSG00000042428 | chr15 | 79991159 | 79991701 |
| ENSMUSG00000047888 | chr15 | 80534721 | 80535165 |
| ENSMUSG00000022407 | chr15 | 80680339 | 80680690 |
| ENSMUSG00000042292 | chr15 | 80917150 | 80917777 |
| ENSMUSG00000022390 | chr15 | 81576280 | 81576777 |
| ENSMUSG00000022389 | chr15 | 81632416 | 81633439 |
| ENSMUSG00000068086 | chr15 | 82285159 | 82285577 |
| ENSMUSG00000058099 | chr15 | 82839093 | 82839626 |
| ENSMUSG00000016664 | chr15 | 83302013 | 83302522 |
| ENSMUSG00000041736 | chr15 | 83396451 | 83396980 |
| ENSMUSG00000036106 | chr15 | 84472296 | 84472952 |
| ENSMUSG00000016624 | chr15 | 84686704 | 84687124 |
| ENSMUSG00000036046 | chr15 | 84806061 | 84806691 |
| ENSMUSG00000065608 | chr15 | 85483885 | 85484404 |
| ENSMUSG00000065608 | chr15 | 85501104 | 85501622 |
| ENSMUSG00000065608 | chr15 | 85508654 | 85509452 |
| ENSMUSG00000065608 | chr15 | 85533755 | 85534189 |
| ENSMUSG00000016028 | chr15 | 85869135 | 85869702 |
| ENSMUSG00000035900 | chr15 | 85899755 | 85900159 |
| ENSMUSG00000034333 | chr15 | 88582570 | 88582987 |
| ENSMUSG00000035757 | chr15 | 88919073 | 88919547 |
| ENSMUSG00000022615 | chr15 | 89203766 | 89204214 |
| ENSMUSG00000036298 | chr15 | 91450102 | 91450475 |
| ENSMUSG00000036167 | chr15 | 93293062 | 93293325 |
| ENSMUSG00000044250 | chr15 | 97134435 | 97134985 |

|                    |       |           |           |
|--------------------|-------|-----------|-----------|
| ENSMUSG00000022479 | chr15 | 97745176  | 97745704  |
| ENSMUSG00000052369 | chr15 | 97780073  | 97780566  |
| ENSMUSG00000022483 | chr15 | 97814599  | 97815451  |
| ENSMUSG00000022483 | chr15 | 97815462  | 97816055  |
| ENSMUSG00000022483 | chr15 | 97816971  | 97817499  |
| ENSMUSG00000022483 | chr15 | 97817669  | 97818880  |
| ENSMUSG00000022483 | chr15 | 97818886  | 97820093  |
| ENSMUSG00000022483 | chr15 | 97821092  | 97821653  |
| ENSMUSG00000022483 | chr15 | 97825093  | 97825615  |
| ENSMUSG00000022483 | chr15 | 97826329  | 97826767  |
| ENSMUSG00000022483 | chr15 | 97826784  | 97827284  |
| ENSMUSG00000022483 | chr15 | 97828474  | 97829275  |
| ENSMUSG00000003360 | chr15 | 98493122  | 98493638  |
| ENSMUSG00000022996 | chr15 | 98607668  | 98608151  |
| ENSMUSG00000043091 | chr15 | 98862845  | 98863365  |
| ENSMUSG00000001076 | chr15 | 98918703  | 98919267  |
| ENSMUSG00000023011 | chr15 | 99343785  | 99344361  |
| ENSMUSG00000043144 | chr15 | 99428191  | 99428738  |
| ENSMUSG00000037438 | chr15 | 99733612  | 99734044  |
| ENSMUSG00000000531 | chr15 | 101051758 | 101052333 |
| ENSMUSG00000075408 | chr15 | 101124163 | 101124678 |
| ENSMUSG00000037003 | chr15 | 101936337 | 101936845 |
| ENSMUSG00000023045 | chr15 | 101980830 | 101981429 |
| ENSMUSG00000076009 | chr15 | 102502714 | 102503190 |
| ENSMUSG00000000555 | chr15 | 103196319 | 103196611 |
| ENSMUSG00000022516 | chr16 | 4912980   | 4913507   |
| ENSMUSG00000022710 | chr16 | 8723125   | 8723666   |
| ENSMUSG00000038037 | chr16 | 10782967  | 10783434  |
| ENSMUSG00000037991 | chr16 | 10843819  | 10844324  |
| ENSMUSG00000082653 | chr16 | 11618400  | 11618817  |
| ENSMUSG00000022681 | chr16 | 13818989  | 13819306  |
| ENSMUSG00000013539 | chr16 | 18345375  | 18345882  |
| ENSMUSG00000041215 | chr16 | 20141192  | 20141787  |
| ENSMUSG00000003233 | chr16 | 20516869  | 20517330  |
| ENSMUSG00000013089 | chr16 | 22428930  | 22429514  |
| ENSMUSG00000013089 | chr16 | 22439198  | 22439671  |
| ENSMUSG00000084511 | chr16 | 22547870  | 22548533  |
| ENSMUSG00000022861 | chr16 | 22661138  | 22661600  |
| ENSMUSG00000038148 | chr16 | 26447824  | 26448271  |
| ENSMUSG00000047434 | chr16 | 31017543  | 31017945  |
| ENSMUSG00000022770 | chr16 | 31551853  | 31552205  |
| ENSMUSG00000022791 | chr16 | 32644716  | 32645365  |
| ENSMUSG00000035629 | chr16 | 32867768  | 32868657  |
| ENSMUSG00000022814 | chr16 | 34181629  | 34182141  |
| ENSMUSG00000022814 | chr16 | 34212992  | 34213616  |
| ENSMUSG00000061751 | chr16 | 34562712  | 34563159  |
| ENSMUSG00000022832 | chr16 | 34628740  | 34629025  |
| ENSMUSG00000022820 | chr16 | 37689818  | 37690373  |
| ENSMUSG00000036279 | chr16 | 43549398  | 43550037  |
| ENSMUSG00000052459 | chr16 | 44136655  | 44137229  |
| ENSMUSG00000022687 | chr16 | 44523195  | 44523757  |
| ENSMUSG00000022748 | chr16 | 57627437  | 57628785  |
| ENSMUSG00000022724 | chr16 | 59471651  | 59471993  |
| ENSMUSG00000032932 | chr16 | 75767837  | 75768303  |
| ENSMUSG00000022889 | chr16 | 84735747  | 84736177  |
| ENSMUSG00000056706 | chr16 | 89586423  | 89586886  |
| ENSMUSG00000022978 | chr16 | 90730384  | 90730651  |
| ENSMUSG00000039680 | chr16 | 92105551  | 92106032  |

|                    |       |          |          |
|--------------------|-------|----------|----------|
| ENSMUSG00000022952 | chr16 | 92778273 | 92778774 |
| ENSMUSG00000076457 | chr16 | 93299984 | 93300389 |
| ENSMUSG00000022948 | chr16 | 93604108 | 93604764 |
| ENSMUSG00000040732 | chr16 | 95794693 | 95795083 |
| ENSMUSG00000084679 | chr16 | 96826672 | 96827211 |
| ENSMUSG00000050272 | chr16 | 97218938 | 97219234 |
| ENSMUSG00000014039 | chr16 | 98073302 | 98074013 |
| ENSMUSG00000023916 | chr17 | 3224422  | 3224873  |
| ENSMUSG00000023800 | chr17 | 3398328  | 3398992  |
| ENSMUSG00000023805 | chr17 | 5975303  | 5975746  |
| ENSMUSG00000023809 | chr17 | 7374314  | 7374991  |
| ENSMUSG00000071322 | chr17 | 7465602  | 7466159  |
| ENSMUSG00000023827 | chr17 | 12311444 | 12312259 |
| ENSMUSG00000014426 | chr17 | 12511601 | 12512148 |
| ENSMUSG00000023886 | chr17 | 14416100 | 14416504 |
| ENSMUSG00000046390 | chr17 | 14683133 | 14683611 |
| ENSMUSG00000079707 | chr17 | 15209272 | 15209894 |
| ENSMUSG00000051341 | chr17 | 21669507 | 21670015 |
| ENSMUSG00000041319 | chr17 | 23810163 | 23810846 |
| ENSMUSG00000002496 | chr17 | 24769535 | 24769878 |
| ENSMUSG00000024163 | chr17 | 25073138 | 25073879 |
| ENSMUSG00000025731 | chr17 | 26011200 | 26011545 |
| ENSMUSG00000037326 | chr17 | 26122511 | 26123363 |
| ENSMUSG00000057789 | chr17 | 27172065 | 27172696 |
| ENSMUSG00000042644 | chr17 | 27188757 | 27189288 |
| ENSMUSG00000042644 | chr17 | 27211356 | 27211874 |
| ENSMUSG00000042644 | chr17 | 27212022 | 27212581 |
| ENSMUSG00000024210 | chr17 | 27316587 | 27317282 |
| ENSMUSG00000044857 | chr17 | 27382881 | 27383384 |
| ENSMUSG00000052146 | chr17 | 27774568 | 27774902 |
| ENSMUSG00000024219 | chr17 | 28082523 | 28083066 |
| ENSMUSG00000038677 | chr17 | 28286199 | 28286724 |
| ENSMUSG00000024220 | chr17 | 28313974 | 28314618 |
| ENSMUSG00000002250 | chr17 | 28360539 | 28360981 |
| ENSMUSG00000002250 | chr17 | 28372913 | 28374336 |
| ENSMUSG00000007570 | chr17 | 28451839 | 28452131 |
| ENSMUSG00000053436 | chr17 | 28827607 | 28828103 |
| ENSMUSG00000053436 | chr17 | 28828611 | 28829344 |
| ENSMUSG00000073428 | chr17 | 29168702 | 29169262 |
| ENSMUSG00000044477 | chr17 | 30294029 | 30294438 |
| ENSMUSG00000052388 | chr17 | 30472748 | 30473132 |
| ENSMUSG00000024026 | chr17 | 30746480 | 30746957 |
| ENSMUSG00000024026 | chr17 | 30749237 | 30749853 |
| ENSMUSG00000061613 | chr17 | 31795605 | 31796360 |
| ENSMUSG00000061126 | chr17 | 32611607 | 32612166 |
| ENSMUSG00000057254 | chr17 | 33034026 | 33034376 |
| ENSMUSG00000024299 | chr17 | 33662188 | 33662449 |
| ENSMUSG00000002307 | chr17 | 34046844 | 34047375 |
| ENSMUSG00000073422 | chr17 | 34164848 | 34165405 |
| ENSMUSG00000024330 | chr17 | 34189257 | 34189653 |
| ENSMUSG00000024330 | chr17 | 34189934 | 34190512 |
| ENSMUSG00000024330 | chr17 | 34190907 | 34191491 |
| ENSMUSG00000024330 | chr17 | 34194054 | 34194400 |
| ENSMUSG00000024330 | chr17 | 34194615 | 34196923 |
| ENSMUSG00000024330 | chr17 | 34199869 | 34200328 |
| ENSMUSG00000024330 | chr17 | 34200432 | 34201106 |
| ENSMUSG00000024335 | chr17 | 34258129 | 34258949 |
| ENSMUSG00000015468 | chr17 | 34705384 | 34705797 |

|                    |       |          |          |
|--------------------|-------|----------|----------|
| ENSMUSG00000059714 | chr17 | 35966709 | 35967157 |
| ENSMUSG00000001525 | chr17 | 35971847 | 35972858 |
| ENSMUSG00000038500 | chr17 | 36133926 | 36134274 |
| ENSMUSG00000045409 | chr17 | 36407616 | 36408164 |
| ENSMUSG00000036214 | chr17 | 37096147 | 37096659 |
| ENSMUSG00000041293 | chr17 | 43389548 | 43389963 |
| ENSMUSG00000023912 | chr17 | 43803693 | 43804075 |
| ENSMUSG00000023935 | chr17 | 45611651 | 45612208 |
| ENSMUSG00000023947 | chr17 | 45693619 | 45694273 |
| ENSMUSG00000023942 | chr17 | 45732522 | 45732995 |
| ENSMUSG00000036026 | chr17 | 45822490 | 45823142 |
| ENSMUSG00000023951 | chr17 | 46166004 | 46166530 |
| ENSMUSG00000012296 | chr17 | 46407344 | 46407885 |
| ENSMUSG00000012296 | chr17 | 46417698 | 46418112 |
| ENSMUSG00000073390 | chr17 | 46481299 | 46481777 |
| ENSMUSG00000067093 | chr17 | 53429918 | 53430459 |
| ENSMUSG00000057835 | chr17 | 56017899 | 56018459 |
| ENSMUSG00000003198 | chr17 | 56031202 | 56031838 |
| ENSMUSG00000062101 | chr17 | 56084194 | 56085083 |
| ENSMUSG00000013236 | chr17 | 56598527 | 56599390 |
| ENSMUSG00000040828 | chr17 | 56795537 | 56796074 |
| ENSMUSG00000002372 | chr17 | 56808093 | 56808627 |
| ENSMUSG00000024206 | chr17 | 56970612 | 56971264 |
| ENSMUSG00000061950 | chr17 | 66135534 | 66136098 |
| ENSMUSG00000024096 | chr17 | 66234789 | 66235392 |
| ENSMUSG00000034647 | chr17 | 66410654 | 66411187 |
| ENSMUSG00000073376 | chr17 | 66707010 | 66707763 |
| ENSMUSG00000024043 | chr17 | 68439987 | 68440500 |
| ENSMUSG00000024044 | chr17 | 69515104 | 69515784 |
| ENSMUSG00000047407 | chr17 | 71196397 | 71196767 |
| ENSMUSG00000024048 | chr17 | 71349540 | 71349992 |
| ENSMUSG00000024052 | chr17 | 71532525 | 71532948 |
| ENSMUSG00000041057 | chr17 | 71947230 | 71948395 |
| ENSMUSG00000039770 | chr17 | 73147179 | 73147713 |
| ENSMUSG00000024067 | chr17 | 74715665 | 74716118 |
| ENSMUSG00000024078 | chr17 | 75244784 | 75245402 |
| ENSMUSG00000037064 | chr17 | 78617497 | 78618115 |
| ENSMUSG00000056121 | chr17 | 78787036 | 78787464 |
| ENSMUSG00000024077 | chr17 | 79135721 | 79136395 |
| ENSMUSG00000024077 | chr17 | 79169488 | 79170077 |
| ENSMUSG00000024070 | chr17 | 79420195 | 79420809 |
| ENSMUSG00000024087 | chr17 | 80181117 | 80181588 |
| ENSMUSG00000024242 | chr17 | 81110482 | 81110902 |
| ENSMUSG00000079333 | chr17 | 81814313 | 81814875 |
| ENSMUSG00000024247 | chr17 | 83301496 | 83303182 |
| ENSMUSG00000032624 | chr17 | 83719417 | 83719840 |
| ENSMUSG00000065732 | chr17 | 84706030 | 84706523 |
| ENSMUSG00000065156 | chr17 | 84763953 | 84764461 |
| ENSMUSG00000065319 | chr17 | 84985100 | 84985946 |
| ENSMUSG00000024253 | chr17 | 85026164 | 85026729 |
| ENSMUSG00000036918 | chr17 | 87682356 | 87682929 |
| ENSMUSG00000036918 | chr17 | 87714198 | 87714844 |
| ENSMUSG00000036438 | chr17 | 87872588 | 87873573 |
| ENSMUSG00000061013 | chr18 | 7004416  | 7005159  |
| ENSMUSG00000073638 | chr18 | 7404073  | 7404902  |
| ENSMUSG00000037769 | chr18 | 8695365  | 8695782  |
| ENSMUSG00000073635 | chr18 | 9858388  | 9859160  |
| ENSMUSG00000024290 | chr18 | 10181106 | 10181679 |

|                    |       |          |          |
|--------------------|-------|----------|----------|
| ENSMUSG00000024404 | chr18 | 12287288 | 12287611 |
| ENSMUSG00000024430 | chr18 | 12884662 | 12885134 |
| ENSMUSG00000024420 | chr18 | 14130812 | 14131210 |
| ENSMUSG00000036225 | chr18 | 15295489 | 15296000 |
| ENSMUSG00000024380 | chr18 | 32719464 | 32719825 |
| ENSMUSG00000034300 | chr18 | 34922043 | 34922477 |
| ENSMUSG00000024360 | chr18 | 35090920 | 35091313 |
| ENSMUSG00000043991 | chr18 | 36440541 | 36440910 |
| ENSMUSG00000001379 | chr18 | 36838788 | 36839334 |
| ENSMUSG00000024456 | chr18 | 38088403 | 38088930 |
| ENSMUSG00000056742 | chr18 | 39704232 | 39704637 |
| ENSMUSG00000024477 | chr18 | 46439989 | 46440522 |
| ENSMUSG00000037416 | chr18 | 49991797 | 49992433 |
| ENSMUSG00000024507 | chr18 | 50308974 | 50309478 |
| ENSMUSG00000024600 | chr18 | 58715937 | 58716276 |
| ENSMUSG00000043079 | chr18 | 60772873 | 60773266 |
| ENSMUSG00000043079 | chr18 | 60805930 | 60806412 |
| ENSMUSG00000024622 | chr18 | 61314764 | 61315322 |
| ENSMUSG00000024516 | chr18 | 65926630 | 65927312 |
| ENSMUSG00000053477 | chr18 | 69707153 | 69707698 |
| ENSMUSG00000024513 | chr18 | 70760702 | 70761332 |
| ENSMUSG00000024556 | chr18 | 73974817 | 73975660 |
| ENSMUSG00000035765 | chr18 | 75178329 | 75179061 |
| ENSMUSG00000025880 | chr18 | 75545692 | 75546095 |
| ENSMUSG00000052928 | chr18 | 75856150 | 75856629 |
| ENSMUSG00000052928 | chr18 | 75857261 | 75857728 |
| ENSMUSG00000052928 | chr18 | 75896727 | 75897176 |
| ENSMUSG00000079589 | chr18 | 76256721 | 76257175 |
| ENSMUSG00000059336 | chr18 | 78359808 | 78360239 |
| ENSMUSG00000024552 | chr18 | 78435178 | 78435806 |
| ENSMUSG00000053950 | chr18 | 80331673 | 80332104 |
| ENSMUSG00000033323 | chr18 | 80748731 | 80749248 |
| ENSMUSG00000033016 | chr18 | 80867261 | 80867725 |
| ENSMUSG00000033016 | chr18 | 80904953 | 80905360 |
| ENSMUSG00000044356 | chr18 | 84758855 | 84759231 |
| ENSMUSG00000073517 | chr18 | 84889697 | 84890128 |
| ENSMUSG00000023066 | chr18 | 89140951 | 89141393 |
| ENSMUSG00000024831 | chr19 | 3282614  | 3283176  |
| ENSMUSG00000024908 | chr19 | 3600531  | 3600934  |
| ENSMUSG00000024913 | chr19 | 3681397  | 3681959  |
| ENSMUSG00000045098 | chr19 | 3767326  | 3767790  |
| ENSMUSG00000001750 | chr19 | 3907203  | 3907790  |
| ENSMUSG00000037916 | chr19 | 4012642  | 4013171  |
| ENSMUSG00000024845 | chr19 | 4126688  | 4127110  |
| ENSMUSG00000045826 | chr19 | 4154084  | 4154597  |
| ENSMUSG00000024830 | chr19 | 4163198  | 4163596  |
| ENSMUSG00000006464 | chr19 | 4895259  | 4895633  |
| ENSMUSG00000024891 | chr19 | 5023637  | 5024051  |
| ENSMUSG00000075264 | chr19 | 5117287  | 5117772  |
| ENSMUSG00000024912 | chr19 | 5444413  | 5445799  |
| ENSMUSG00000024909 | chr19 | 5475347  | 5475932  |
| ENSMUSG00000054874 | chr19 | 5684490  | 5684990  |
| ENSMUSG00000024941 | chr19 | 5800727  | 5801521  |
| ENSMUSG00000024941 | chr19 | 5801953  | 5802329  |
| ENSMUSG00000043488 | chr19 | 5843477  | 5844673  |
| ENSMUSG00000043488 | chr19 | 5844752  | 5845641  |
| ENSMUSG00000024807 | chr19 | 6047448  | 6047847  |
| ENSMUSG00000024790 | chr19 | 6116671  | 6117153  |

|                    |       |          |          |
|--------------------|-------|----------|----------|
| ENSMUSG00000024786 | chr19 | 6181733  | 6182065  |
| ENSMUSG00000079467 | chr19 | 6364461  | 6365134  |
| ENSMUSG00000024952 | chr19 | 6915111  | 6915577  |
| ENSMUSG00000024952 | chr19 | 6922206  | 6923016  |
| ENSMUSG00000056612 | chr19 | 7050217  | 7050692  |
| ENSMUSG00000036278 | chr19 | 7156069  | 7156671  |
| ENSMUSG00000047787 | chr19 | 7205710  | 7206165  |
| ENSMUSG00000024767 | chr19 | 7281194  | 7281644  |
| ENSMUSG00000024759 | chr19 | 7568575  | 7569027  |
| ENSMUSG00000069833 | chr19 | 9062907  | 9063666  |
| ENSMUSG00000069833 | chr19 | 9064792  | 9065258  |
| ENSMUSG00000069833 | chr19 | 9066881  | 9067561  |
| ENSMUSG00000024740 | chr19 | 10680440 | 10681014 |
| ENSMUSG00000039982 | chr19 | 12575926 | 12576290 |
| ENSMUSG00000039982 | chr19 | 12592827 | 12593080 |
| ENSMUSG00000039126 | chr19 | 17217774 | 17218309 |
| ENSMUSG00000024750 | chr19 | 21346280 | 21346824 |
| ENSMUSG00000024754 | chr19 | 21824870 | 21825233 |
| ENSMUSG00000024754 | chr19 | 21852991 | 21853643 |
| ENSMUSG00000024754 | chr19 | 21861671 | 21862176 |
| ENSMUSG00000052942 | chr19 | 28702529 | 28702961 |
| ENSMUSG00000024785 | chr19 | 29186855 | 29187453 |
| ENSMUSG00000024887 | chr19 | 32284952 | 32285712 |
| ENSMUSG00000067297 | chr19 | 34715193 | 34715735 |
| ENSMUSG00000033519 | chr19 | 34952384 | 34952898 |
| ENSMUSG00000024803 | chr19 | 36288297 | 36288671 |
| ENSMUSG00000048612 | chr19 | 38102353 | 38102884 |
| ENSMUSG00000054200 | chr19 | 38175037 | 38175531 |
| ENSMUSG00000025001 | chr19 | 39004545 | 39005372 |
| ENSMUSG00000025008 | chr19 | 40686372 | 40686972 |
| ENSMUSG00000025016 | chr19 | 41334997 | 41335654 |
| ENSMUSG00000034321 | chr19 | 42007551 | 42007985 |
| ENSMUSG00000044345 | chr19 | 42221641 | 42222092 |
| ENSMUSG00000025185 | chr19 | 42694689 | 42695186 |
| ENSMUSG00000074852 | chr19 | 43433176 | 43433720 |
| ENSMUSG00000045472 | chr19 | 46592427 | 46592808 |
| ENSMUSG00000025036 | chr19 | 46648246 | 46648621 |
| ENSMUSG00000033033 | chr19 | 47211287 | 47211776 |
| ENSMUSG00000025064 | chr19 | 47722324 | 47722881 |
| ENSMUSG00000025064 | chr19 | 47723304 | 47724092 |
| ENSMUSG00000025064 | chr19 | 47724170 | 47724999 |
| ENSMUSG00000025064 | chr19 | 47725107 | 47725591 |
| ENSMUSG00000025064 | chr19 | 47726447 | 47726950 |
| ENSMUSG00000025064 | chr19 | 47727549 | 47728156 |
| ENSMUSG00000025064 | chr19 | 47731259 | 47731777 |
| ENSMUSG00000025064 | chr19 | 47734169 | 47734674 |
| ENSMUSG00000025064 | chr19 | 47734996 | 47735553 |
| ENSMUSG00000046585 | chr19 | 48012316 | 48012908 |
| ENSMUSG00000033717 | chr19 | 54118846 | 54119603 |
| ENSMUSG00000074769 | chr19 | 56096801 | 56097654 |
| ENSMUSG00000025075 | chr19 | 56362782 | 56363314 |
| ENSMUSG00000035283 | chr19 | 56753861 | 56754837 |
| ENSMUSG00000078103 | chr19 | 57115547 | 57116352 |
| ENSMUSG00000025085 | chr19 | 57271932 | 57272358 |
| ENSMUSG00000033478 | chr19 | 57456015 | 57456575 |
| ENSMUSG00000024993 | chr19 | 60887285 | 60887640 |
| ENSMUSG00000026662 | chr2  | 4801890  | 4802379  |
| ENSMUSG00000039145 | chr2  | 5629260  | 5629730  |



|                    |      |          |          |
|--------------------|------|----------|----------|
| ENSMUSG00000039145 | chr2 | 5635154  | 5635545  |
| ENSMUSG00000081202 | chr2 | 9396048  | 9396401  |
| ENSMUSG00000079603 | chr2 | 9614787  | 9615158  |
| ENSMUSG00000061186 | chr2 | 10236305 | 10236793 |
| ENSMUSG00000049630 | chr2 | 12931869 | 12932468 |
| ENSMUSG00000026728 | chr2 | 13493771 | 13494392 |
| ENSMUSG00000026728 | chr2 | 13500200 | 13500564 |
| ENSMUSG00000083281 | chr2 | 19029598 | 19029978 |
| ENSMUSG00000043415 | chr2 | 19579825 | 19580167 |
| ENSMUSG00000006476 | chr2 | 24909949 | 24911080 |
| ENSMUSG00000036352 | chr2 | 25877174 | 25877534 |
| ENSMUSG00000026930 | chr2 | 26181180 | 26181914 |
| ENSMUSG00000026837 | chr2 | 27742650 | 27744488 |
| ENSMUSG00000026837 | chr2 | 27813836 | 27814342 |
| ENSMUSG00000026837 | chr2 | 27815683 | 27816205 |
| ENSMUSG00000026837 | chr2 | 27820642 | 27821450 |
| ENSMUSG00000026837 | chr2 | 27824999 | 27825597 |
| ENSMUSG00000026837 | chr2 | 27829711 | 27830554 |
| ENSMUSG00000026837 | chr2 | 27835805 | 27836147 |
| ENSMUSG00000026837 | chr2 | 27836181 | 27836955 |
| ENSMUSG00000026835 | chr2 | 27938289 | 27938766 |
| ENSMUSG00000082788 | chr2 | 28955875 | 28956904 |
| ENSMUSG00000039844 | chr2 | 29511329 | 29511880 |
| ENSMUSG00000039826 | chr2 | 29635755 | 29636282 |
| ENSMUSG00000065485 | chr2 | 29701489 | 29702003 |
| ENSMUSG00000047363 | chr2 | 30456497 | 30456875 |
| ENSMUSG00000084143 | chr2 | 30780663 | 30781116 |
| ENSMUSG00000026848 | chr2 | 30798086 | 30798729 |
| ENSMUSG00000026851 | chr2 | 30837142 | 30838004 |
| ENSMUSG00000055632 | chr2 | 31151613 | 31152239 |
| ENSMUSG00000055632 | chr2 | 31153871 | 31154197 |
| ENSMUSG00000039254 | chr2 | 32091691 | 32092338 |
| ENSMUSG00000044627 | chr2 | 32143150 | 32143596 |
| ENSMUSG00000065554 | chr2 | 32159955 | 32160736 |
| ENSMUSG00000026819 | chr2 | 32306370 | 32307009 |
| ENSMUSG00000026796 | chr2 | 32725788 | 32726330 |
| ENSMUSG00000081244 | chr2 | 33573268 | 33573685 |
| ENSMUSG00000081244 | chr2 | 33616684 | 33617164 |
| ENSMUSG00000038740 | chr2 | 33676958 | 33677638 |
| ENSMUSG00000038718 | chr2 | 34122061 | 34122581 |
| ENSMUSG00000035778 | chr2 | 35300904 | 35301364 |
| ENSMUSG00000026889 | chr2 | 35991805 | 35992303 |
| ENSMUSG00000083849 | chr2 | 44381879 | 44382372 |
| ENSMUSG00000026872 | chr2 | 44972852 | 44973161 |
| ENSMUSG00000069495 | chr2 | 49306254 | 49306675 |
| ENSMUSG00000026765 | chr2 | 49599909 | 49600616 |
| ENSMUSG00000036249 | chr2 | 51790223 | 51790763 |
| ENSMUSG00000083287 | chr2 | 53717784 | 53718158 |
| ENSMUSG00000060988 | chr2 | 54420141 | 54420584 |
| ENSMUSG00000026827 | chr2 | 57090234 | 57090616 |
| ENSMUSG00000035168 | chr2 | 59450291 | 59450704 |
| ENSMUSG00000026971 | chr2 | 60664343 | 60664901 |
| ENSMUSG00000026970 | chr2 | 60801086 | 60801617 |
| ENSMUSG00000063145 | chr2 | 69484712 | 69485310 |
| ENSMUSG00000027086 | chr2 | 69551362 | 69551920 |
| ENSMUSG00000027010 | chr2 | 71205410 | 71205844 |
| ENSMUSG00000041911 | chr2 | 71337955 | 71338319 |
| ENSMUSG00000015839 | chr2 | 75541343 | 75541856 |

|                    |      |           |           |
|--------------------|------|-----------|-----------|
| ENSMUSG00000027079 | chr2 | 84567538  | 84567983  |
| ENSMUSG00000034059 | chr2 | 84575215  | 84575890  |
| ENSMUSG00000002105 | chr2 | 90909932  | 90910630  |
| ENSMUSG00000081248 | chr2 | 91228401  | 91228786  |
| ENSMUSG00000027230 | chr2 | 91851942  | 91852596  |
| ENSMUSG00000027230 | chr2 | 91856277  | 91857673  |
| ENSMUSG00000027220 | chr2 | 92755041  | 92755525  |
| ENSMUSG00000075025 | chr2 | 93291270  | 93291749  |
| ENSMUSG00000050587 | chr2 | 97318240  | 97318772  |
| ENSMUSG00000082972 | chr2 | 100866389 | 100866757 |
| ENSMUSG00000082328 | chr2 | 101970656 | 101971007 |
| ENSMUSG00000027188 | chr2 | 102397139 | 102397468 |
| ENSMUSG00000005087 | chr2 | 102796088 | 102796583 |
| ENSMUSG00000032724 | chr2 | 103407109 | 103407699 |
| ENSMUSG00000027185 | chr2 | 103601162 | 103601660 |
| ENSMUSG00000005973 | chr2 | 105239048 | 105239570 |
| ENSMUSG00000027130 | chr2 | 112105366 | 112105862 |
| ENSMUSG00000074934 | chr2 | 113622012 | 113622394 |
| ENSMUSG00000027347 | chr2 | 117250202 | 117250759 |
| ENSMUSG00000027347 | chr2 | 117441924 | 117442263 |
| ENSMUSG00000027324 | chr2 | 118860376 | 118860830 |
| ENSMUSG00000027315 | chr2 | 119067869 | 119068255 |
| ENSMUSG00000034216 | chr2 | 119114107 | 119114531 |
| ENSMUSG00000046110 | chr2 | 121283094 | 121283733 |
| ENSMUSG00000033411 | chr2 | 121781344 | 121781716 |
| ENSMUSG00000033268 | chr2 | 122163814 | 122164259 |
| ENSMUSG00000074876 | chr2 | 122456119 | 122456460 |
| ENSMUSG00000027395 | chr2 | 128919633 | 128919971 |
| ENSMUSG00000060029 | chr2 | 130389606 | 130390354 |
| ENSMUSG00000068264 | chr2 | 131035824 | 131036337 |
| ENSMUSG00000027339 | chr2 | 131831859 | 131832347 |
| ENSMUSG00000027276 | chr2 | 137434190 | 137434600 |
| ENSMUSG00000039033 | chr2 | 139892225 | 139892602 |
| ENSMUSG00000027422 | chr2 | 143835329 | 143836248 |
| ENSMUSG00000082480 | chr2 | 143990718 | 143991056 |
| ENSMUSG00000063873 | chr2 | 145039526 | 145040083 |
| ENSMUSG00000037110 | chr2 | 146337969 | 146338338 |
| ENSMUSG00000053545 | chr2 | 147001307 | 147001609 |
| ENSMUSG00000053916 | chr2 | 150864975 | 150865602 |
| ENSMUSG00000032802 | chr2 | 151931414 | 151931775 |
| ENSMUSG00000074698 | chr2 | 152062048 | 152062411 |
| ENSMUSG00000038467 | chr2 | 154482478 | 154482915 |
| ENSMUSG00000074656 | chr2 | 154718306 | 154718769 |
| ENSMUSG00000038383 | chr2 | 155183078 | 155183403 |
| ENSMUSG00000038324 | chr2 | 155517945 | 155518497 |
| ENSMUSG00000074647 | chr2 | 155678547 | 155678864 |
| ENSMUSG00000038116 | chr2 | 156070724 | 156071134 |
| ENSMUSG00000067818 | chr2 | 156600370 | 156600940 |
| ENSMUSG00000055485 | chr2 | 156899560 | 156900005 |
| ENSMUSG00000055485 | chr2 | 156904665 | 156904951 |
| ENSMUSG00000082329 | chr2 | 157359364 | 157359842 |
| ENSMUSG00000018322 | chr2 | 163934257 | 163934772 |
| ENSMUSG00000039873 | chr2 | 164659014 | 164659561 |
| ENSMUSG00000006800 | chr2 | 166126782 | 166127145 |
| ENSMUSG00000039621 | chr2 | 166555318 | 166555683 |
| ENSMUSG00000017969 | chr2 | 167057609 | 167058069 |
| ENSMUSG00000042821 | chr2 | 167363678 | 167364282 |
| ENSMUSG00000081511 | chr2 | 167395547 | 167396085 |

|                    |      |           |           |
|--------------------|------|-----------|-----------|
| ENSMUSG00000081511 | chr2 | 167415833 | 167416302 |
| ENSMUSG00000019755 | chr2 | 167486251 | 167486762 |
| ENSMUSG00000056501 | chr2 | 167515289 | 167515688 |
| ENSMUSG00000006462 | chr2 | 167517361 | 167517930 |
| ENSMUSG00000006462 | chr2 | 167527509 | 167528041 |
| ENSMUSG00000027540 | chr2 | 167776715 | 167777199 |
| ENSMUSG00000008999 | chr2 | 172721175 | 172721465 |
| ENSMUSG00000027569 | chr2 | 180316189 | 180316687 |
| ENSMUSG00000027570 | chr2 | 180333368 | 180333886 |
| ENSMUSG00000027570 | chr2 | 180335401 | 180335778 |
| ENSMUSG00000027570 | chr2 | 180335972 | 180336863 |
| ENSMUSG00000027570 | chr2 | 180344446 | 180345165 |
| ENSMUSG00000027570 | chr2 | 180345759 | 180346359 |
| ENSMUSG00000027570 | chr2 | 180347369 | 180348038 |
| ENSMUSG00000074728 | chr3 | 5210247   | 5210730   |
| ENSMUSG00000040374 | chr3 | 5576282   | 5576691   |
| ENSMUSG00000027555 | chr3 | 14629058  | 14629423  |
| ENSMUSG00000039286 | chr3 | 27607835  | 27608404  |
| ENSMUSG00000043164 | chr3 | 27766378  | 27766637  |
| ENSMUSG00000027695 | chr3 | 28006242  | 28007127  |
| ENSMUSG00000037730 | chr3 | 30501032  | 30501420  |
| ENSMUSG00000037643 | chr3 | 30922116  | 30922642  |
| ENSMUSG00000027665 | chr3 | 32296416  | 32296954  |
| ENSMUSG00000027708 | chr3 | 35824852  | 35825285  |
| ENSMUSG00000054779 | chr3 | 37269211  | 37269805  |
| ENSMUSG00000046743 | chr3 | 38642336  | 38642824  |
| ENSMUSG00000023087 | chr3 | 51028263  | 51028785  |
| ENSMUSG00000070490 | chr3 | 52288060  | 52288500  |
| ENSMUSG00000048332 | chr3 | 53008037  | 53008558  |
| ENSMUSG00000048332 | chr3 | 53014470  | 53015103  |
| ENSMUSG00000027750 | chr3 | 54162086  | 54162991  |
| ENSMUSG00000036580 | chr3 | 54902867  | 54903238  |
| ENSMUSG00000027806 | chr3 | 58221037  | 58221396  |
| ENSMUSG00000027822 | chr3 | 63768240  | 63768840  |
| ENSMUSG00000074580 | chr3 | 65333050  | 65333493  |
| ENSMUSG00000027832 | chr3 | 65966973  | 65967368  |
| ENSMUSG00000027832 | chr3 | 66024750  | 66025209  |
| ENSMUSG00000047557 | chr3 | 67267331  | 67267749  |
| ENSMUSG00000027788 | chr3 | 69830387  | 69830851  |
| ENSMUSG00000027995 | chr3 | 83645114  | 83645569  |
| ENSMUSG00000027995 | chr3 | 83649403  | 83649902  |
| ENSMUSG00000027993 | chr3 | 84122983  | 84123538  |
| ENSMUSG00000041842 | chr3 | 84283417  | 84283877  |
| ENSMUSG00000031286 | chr3 | 85676478  | 85676988  |
| ENSMUSG00000049013 | chr3 | 85798672  | 85799113  |
| ENSMUSG00000028073 | chr3 | 87568439  | 87568816  |
| ENSMUSG00000028063 | chr3 | 88299421  | 88299971  |
| ENSMUSG00000028059 | chr3 | 88423644  | 88424012  |
| ENSMUSG00000068921 | chr3 | 88754818  | 88755110  |
| ENSMUSG00000027937 | chr3 | 90035015  | 90035633  |
| ENSMUSG00000001018 | chr3 | 90299653  | 90300307  |
| ENSMUSG00000001021 | chr3 | 90404629  | 90405114  |
| ENSMUSG00000001025 | chr3 | 90416664  | 90417132  |
| ENSMUSG00000015943 | chr3 | 96000786  | 96001213  |
| ENSMUSG00000038170 | chr3 | 97671851  | 97672305  |
| ENSMUSG00000027864 | chr3 | 100882005 | 100882425 |
| ENSMUSG00000027859 | chr3 | 102165999 | 102166526 |
| ENSMUSG00000000562 | chr3 | 105697150 | 105697578 |

|                    |      |           |           |
|--------------------|------|-----------|-----------|
| ENSMUSG00000027901 | chr3 | 106297541 | 106298003 |
| ENSMUSG00000014599 | chr3 | 107546892 | 107547534 |
| ENSMUSG00000027966 | chr3 | 113734720 | 113735207 |
| ENSMUSG00000027966 | chr3 | 113736823 | 113737164 |
| ENSMUSG00000027966 | chr3 | 113826963 | 113827431 |
| ENSMUSG00000027966 | chr3 | 113860927 | 113861210 |
| ENSMUSG00000027966 | chr3 | 113867209 | 113867514 |
| ENSMUSG00000027966 | chr3 | 113884084 | 113884448 |
| ENSMUSG00000027966 | chr3 | 113888736 | 113888964 |
| ENSMUSG00000027966 | chr3 | 113896676 | 113897243 |
| ENSMUSG00000028125 | chr3 | 121793973 | 121794679 |
| ENSMUSG00000028121 | chr3 | 122212450 | 122212853 |
| ENSMUSG00000050315 | chr3 | 122842924 | 122843455 |
| ENSMUSG00000050315 | chr3 | 122938922 | 122939498 |
| ENSMUSG00000039234 | chr3 | 122999445 | 122999913 |
| ENSMUSG00000053819 | chr3 | 126422805 | 126423239 |
| ENSMUSG00000078587 | chr3 | 126627215 | 126627572 |
| ENSMUSG00000019232 | chr3 | 130266955 | 130267337 |
| ENSMUSG00000004127 | chr3 | 137806334 | 137806922 |
| ENSMUSG00000028149 | chr3 | 138737683 | 138738069 |
| ENSMUSG00000028266 | chr3 | 143927485 | 143927783 |
| ENSMUSG00000028197 | chr3 | 145024638 | 145025058 |
| ENSMUSG00000074182 | chr3 | 145104252 | 145104534 |
| ENSMUSG00000074182 | chr3 | 145136916 | 145137555 |
| ENSMUSG00000074182 | chr3 | 145149118 | 145149406 |
| ENSMUSG00000074182 | chr3 | 145170398 | 145170951 |
| ENSMUSG00000028194 | chr3 | 145453076 | 145453681 |
| ENSMUSG00000054942 | chr3 | 151971577 | 151971924 |
| ENSMUSG00000028201 | chr3 | 154077423 | 154079190 |
| ENSMUSG00000028182 | chr3 | 154756407 | 154756792 |
| ENSMUSG00000049119 | chr4 | 5571367   | 5571891   |
| ENSMUSG00000064698 | chr4 | 9672669   | 9673148   |
| ENSMUSG00000028218 | chr4 | 12098940  | 12099387  |
| ENSMUSG00000040550 | chr4 | 14753639  | 14753923  |
| ENSMUSG00000028261 | chr4 | 24825162  | 24825526  |
| ENSMUSG00000028284 | chr4 | 32050562  | 32051411  |
| ENSMUSG00000028277 | chr4 | 33118237  | 33118599  |
| ENSMUSG00000039967 | chr4 | 34833698  | 34834152  |
| ENSMUSG00000081720 | chr4 | 40573352  | 40573731  |
| ENSMUSG00000028427 | chr4 | 40987277  | 40987826  |
| ENSMUSG00000036002 | chr4 | 43051558  | 43052635  |
| ENSMUSG00000028464 | chr4 | 43535181  | 43535732  |
| ENSMUSG00000028464 | chr4 | 43537438  | 43537722  |
| ENSMUSG00000039813 | chr4 | 46674268  | 46674773  |
| ENSMUSG00000039809 | chr4 | 46857877  | 46858104  |
| ENSMUSG00000028339 | chr4 | 47231680  | 47232259  |
| ENSMUSG00000007613 | chr4 | 47299651  | 47300277  |
| ENSMUSG00000007613 | chr4 | 47305880  | 47306374  |
| ENSMUSG00000028343 | chr4 | 48292235  | 48293206  |
| ENSMUSG00000028347 | chr4 | 48598979  | 48599473  |
| ENSMUSG00000028412 | chr4 | 53453966  | 53454378  |
| ENSMUSG00000038764 | chr4 | 57307528  | 57308226  |
| ENSMUSG00000028367 | chr4 | 57968449  | 57969260  |
| ENSMUSG00000028389 | chr4 | 61869355  | 61870088  |
| ENSMUSG00000066149 | chr4 | 62069242  | 62069923  |
| ENSMUSG00000028394 | chr4 | 62185641  | 62186476  |
| ENSMUSG00000077161 | chr4 | 62396834  | 62397423  |
| ENSMUSG00000045672 | chr4 | 62886682  | 62887308  |

|                    |      |           |           |
|--------------------|------|-----------|-----------|
| ENSMUSG00000070102 | chr4 | 62914388  | 62915078  |
| ENSMUSG00000039196 | chr4 | 62961534  | 62962035  |
| ENSMUSG00000039196 | chr4 | 62962057  | 62963188  |
| ENSMUSG00000039196 | chr4 | 62966012  | 62966438  |
| ENSMUSG00000039196 | chr4 | 62970548  | 62970916  |
| ENSMUSG00000039196 | chr4 | 62977946  | 62979331  |
| ENSMUSG00000039196 | chr4 | 62979806  | 62980860  |
| ENSMUSG00000039158 | chr4 | 63071261  | 63071724  |
| ENSMUSG00000039105 | chr4 | 63205996  | 63206687  |
| ENSMUSG00000039105 | chr4 | 63208753  | 63209256  |
| ENSMUSG00000048706 | chr4 | 80564571  | 80565116  |
| ENSMUSG00000052407 | chr4 | 83170634  | 83171067  |
| ENSMUSG00000052407 | chr4 | 83171421  | 83171981  |
| ENSMUSG00000028497 | chr4 | 88125917  | 88126367  |
| ENSMUSG00000028572 | chr4 | 95601341  | 95601726  |
| ENSMUSG00000035305 | chr4 | 99900808  | 99901328  |
| ENSMUSG00000082928 | chr4 | 100906955 | 100907561 |
| ENSMUSG00000028601 | chr4 | 107838088 | 107838503 |
| ENSMUSG00000028559 | chr4 | 108820108 | 108820711 |
| ENSMUSG00000084673 | chr4 | 111187678 | 111188076 |
| ENSMUSG00000070867 | chr4 | 114092785 | 114093186 |
| ENSMUSG00000055210 | chr4 | 114582030 | 114582343 |
| ENSMUSG00000063882 | chr4 | 115745312 | 115745821 |
| ENSMUSG00000028693 | chr4 | 116299512 | 116299845 |
| ENSMUSG00000028540 | chr4 | 117564477 | 117564879 |
| ENSMUSG00000028635 | chr4 | 119721617 | 119722090 |
| ENSMUSG00000028626 | chr4 | 120713331 | 120713976 |
| ENSMUSG00000028626 | chr4 | 120717214 | 120717573 |
| ENSMUSG00000028626 | chr4 | 120724810 | 120725305 |
| ENSMUSG00000028626 | chr4 | 120726246 | 120726729 |
| ENSMUSG00000082310 | chr4 | 123496384 | 123496782 |
| ENSMUSG00000032643 | chr4 | 124377510 | 124377854 |
| ENSMUSG00000028871 | chr4 | 124664156 | 124664564 |
| ENSMUSG00000028869 | chr4 | 124694653 | 124695129 |
| ENSMUSG00000050212 | chr4 | 125809375 | 125809916 |
| ENSMUSG00000040690 | chr4 | 129734827 | 129735988 |
| ENSMUSG00000040690 | chr4 | 129737418 | 129738013 |
| ENSMUSG00000040690 | chr4 | 129738335 | 129738838 |
| ENSMUSG00000040690 | chr4 | 129744035 | 129744582 |
| ENSMUSG00000040690 | chr4 | 129745369 | 129745918 |
| ENSMUSG00000028779 | chr4 | 129756732 | 129757224 |
| ENSMUSG00000028779 | chr4 | 129763151 | 129763500 |
| ENSMUSG00000028779 | chr4 | 129773391 | 129774029 |
| ENSMUSG00000028779 | chr4 | 129774823 | 129775279 |
| ENSMUSG00000028779 | chr4 | 129777815 | 129778285 |
| ENSMUSG00000028776 | chr4 | 129861561 | 129861957 |
| ENSMUSG00000028581 | chr4 | 130452184 | 130452487 |
| ENSMUSG00000028911 | chr4 | 131429859 | 131430290 |
| ENSMUSG00000070717 | chr4 | 131586849 | 131587387 |
| ENSMUSG00000028886 | chr4 | 132208777 | 132209207 |
| ENSMUSG00000028854 | chr4 | 132927329 | 132927589 |
| ENSMUSG00000056596 | chr4 | 133053800 | 133054275 |
| ENSMUSG00000037188 | chr4 | 135100841 | 135101290 |
| ENSMUSG0000007872  | chr4 | 135673261 | 135673587 |
| ENSMUSG00000036896 | chr4 | 136447555 | 136448769 |
| ENSMUSG00000070667 | chr4 | 136943898 | 136944463 |
| ENSMUSG00000028763 | chr4 | 137025504 | 137026000 |
| ENSMUSG00000006445 | chr4 | 140842789 | 140843181 |

|                    |      |           |           |
|--------------------|------|-----------|-----------|
| ENSMUSG00000057637 | chr4 | 142807196 | 142807671 |
| ENSMUSG00000029020 | chr4 | 147292448 | 147293496 |
| ENSMUSG00000028979 | chr4 | 147978816 | 147979105 |
| ENSMUSG00000042804 | chr4 | 151636424 | 151636959 |
| ENSMUSG00000039577 | chr4 | 151865403 | 151865872 |
| ENSMUSG00000039410 | chr4 | 153896033 | 153896303 |
| ENSMUSG00000051276 | chr4 | 154128621 | 154128936 |
| ENSMUSG00000029050 | chr4 | 154529208 | 154529764 |
| ENSMUSG00000029050 | chr4 | 154610008 | 154610405 |
| ENSMUSG00000042116 | chr4 | 155144000 | 155144379 |
| ENSMUSG00000040302 | chr5 | 3603195   | 3603484   |
| ENSMUSG00000046798 | chr5 | 5514739   | 5515088   |
| ENSMUSG00000062038 | chr5 | 13229790  | 13230288  |
| ENSMUSG00000080293 | chr5 | 14823640  | 14823954  |
| ENSMUSG00000028780 | chr5 | 17195459  | 17196140  |
| ENSMUSG00000040003 | chr5 | 19097108  | 19097401  |
| ENSMUSG00000028771 | chr5 | 20560664  | 20561254  |
| ENSMUSG00000029004 | chr5 | 22963034  | 22963590  |
| ENSMUSG00000023353 | chr5 | 23958178  | 23958804  |
| ENSMUSG00000076387 | chr5 | 24096963  | 24097671  |
| ENSMUSG00000028949 | chr5 | 24128359  | 24128818  |
| ENSMUSG00000028938 | chr5 | 24690893  | 24691427  |
| ENSMUSG00000038828 | chr5 | 31152349  | 31152918  |
| ENSMUSG00000029162 | chr5 | 31221434  | 31221990  |
| ENSMUSG00000029145 | chr5 | 31495302  | 31495828  |
| ENSMUSG00000078181 | chr5 | 31939133  | 31939587  |
| ENSMUSG00000073058 | chr5 | 32435091  | 32435561  |
| ENSMUSG00000082305 | chr5 | 33015750  | 33016382  |
| ENSMUSG00000037373 | chr5 | 33606807  | 33607293  |
| ENSMUSG00000037373 | chr5 | 33616947  | 33617360  |
| ENSMUSG00000037339 | chr5 | 33970733  | 33971138  |
| ENSMUSG00000019295 | chr5 | 33999828  | 34000332  |
| ENSMUSG00000059866 | chr5 | 34855388  | 34855908  |
| ENSMUSG00000029094 | chr5 | 36240720  | 36241102  |
| ENSMUSG00000029190 | chr5 | 37086574  | 37086906  |
| ENSMUSG00000029190 | chr5 | 37103906  | 37104253  |
| ENSMUSG00000029092 | chr5 | 45503296  | 45503732  |
| ENSMUSG00000015880 | chr5 | 46060485  | 46061019  |
| ENSMUSG00000029178 | chr5 | 64970884  | 64971227  |
| ENSMUSG00000029178 | chr5 | 65194581  | 65195124  |
| ENSMUSG00000037822 | chr5 | 65883315  | 65883953  |
| ENSMUSG00000054598 | chr5 | 66396277  | 66396818  |
| ENSMUSG00000070733 | chr5 | 73646961  | 73647575  |
| ENSMUSG00000029228 | chr5 | 75050461  | 75051247  |
| ENSMUSG00000029231 | chr5 | 75548720  | 75549491  |
| ENSMUSG00000029231 | chr5 | 75552661  | 75553127  |
| ENSMUSG00000006262 | chr5 | 89128527  | 89128937  |
| ENSMUSG00000029366 | chr5 | 89193842  | 89194295  |
| ENSMUSG00000035505 | chr5 | 90652957  | 90653314  |
| ENSMUSG00000029413 | chr5 | 92717529  | 92718014  |
| ENSMUSG00000029415 | chr5 | 92738500  | 92739288  |
| ENSMUSG00000047963 | chr5 | 93021075  | 93021477  |
| ENSMUSG00000058013 | chr5 | 93521818  | 93522291  |
| ENSMUSG00000058013 | chr5 | 93522732  | 93523084  |
| ENSMUSG00000029484 | chr5 | 97215243  | 97215705  |
| ENSMUSG00000084126 | chr5 | 104008570 | 104009106 |
| ENSMUSG00000064629 | chr5 | 104267609 | 104268162 |
| ENSMUSG00000034528 | chr5 | 104410225 | 104410567 |

|                    |      |           |           |
|--------------------|------|-----------|-----------|
| ENSMUSG00000029310 | chr5 | 104484025 | 104484482 |
| ENSMUSG00000049606 | chr5 | 107125807 | 107126158 |
| ENSMUSG00000084218 | chr5 | 107569560 | 107569866 |
| ENSMUSG00000062234 | chr5 | 109058634 | 109059203 |
| ENSMUSG00000033316 | chr5 | 110992506 | 110992896 |
| ENSMUSG00000072734 | chr5 | 111586739 | 111587144 |
| ENSMUSG00000070576 | chr5 | 111846180 | 111846497 |
| ENSMUSG00000070576 | chr5 | 111849480 | 111850485 |
| ENSMUSG00000052848 | chr5 | 111960201 | 111960707 |
| ENSMUSG00000029352 | chr5 | 113528670 | 113529113 |
| ENSMUSG00000051339 | chr5 | 113588711 | 113589179 |
| ENSMUSG00000051339 | chr5 | 113594562 | 113594935 |
| ENSMUSG00000053334 | chr5 | 114188903 | 114189318 |
| ENSMUSG00000025825 | chr5 | 114222543 | 114222871 |
| ENSMUSG00000065320 | chr5 | 114380972 | 114381425 |
| ENSMUSG00000044339 | chr5 | 114577938 | 114578402 |
| ENSMUSG00000011884 | chr5 | 115141207 | 115141644 |
| ENSMUSG00000046562 | chr5 | 115583602 | 115584096 |
| ENSMUSG00000046562 | chr5 | 115586179 | 115587027 |
| ENSMUSG00000048578 | chr5 | 115606878 | 115607334 |
| ENSMUSG00000067274 | chr5 | 116010582 | 116011307 |
| ENSMUSG00000018604 | chr5 | 120069785 | 120070203 |
| ENSMUSG00000029601 | chr5 | 121039086 | 121039381 |
| ENSMUSG00000001166 | chr5 | 121262425 | 121263023 |
| ENSMUSG00000062438 | chr5 | 121956735 | 121957307 |
| ENSMUSG00000042594 | chr5 | 122280557 | 122280980 |
| ENSMUSG00000083909 | chr5 | 122751843 | 122752343 |
| ENSMUSG00000056735 | chr5 | 123400422 | 123400870 |
| ENSMUSG00000054434 | chr5 | 123526092 | 123526621 |
| ENSMUSG00000029449 | chr5 | 123583735 | 123584178 |
| ENSMUSG00000062946 | chr5 | 123588426 | 123589026 |
| ENSMUSG00000049550 | chr5 | 124133980 | 124134325 |
| ENSMUSG00000000915 | chr5 | 124423232 | 124423595 |
| ENSMUSG00000066278 | chr5 | 124457116 | 124457723 |
| ENSMUSG00000029394 | chr5 | 124803260 | 124803723 |
| ENSMUSG00000029478 | chr5 | 125725877 | 125726424 |
| ENSMUSG00000008348 | chr5 | 125885561 | 125885941 |
| ENSMUSG00000029439 | chr5 | 130007172 | 130007490 |
| ENSMUSG00000025534 | chr5 | 130465180 | 130465716 |
| ENSMUSG00000025534 | chr5 | 130475016 | 130475483 |
| ENSMUSG00000060371 | chr5 | 130813476 | 130813883 |
| ENSMUSG00000076320 | chr5 | 134913268 | 134913896 |
| ENSMUSG00000023104 | chr5 | 135058453 | 135058907 |
| ENSMUSG00000029675 | chr5 | 135244243 | 135244913 |
| ENSMUSG00000053293 | chr5 | 135941588 | 135942137 |
| ENSMUSG00000039886 | chr5 | 136211561 | 136212024 |
| ENSMUSG00000039860 | chr5 | 136276750 | 136277309 |
| ENSMUSG00000051391 | chr5 | 136410631 | 136411239 |
| ENSMUSG00000039771 | chr5 | 136591986 | 136592444 |
| ENSMUSG00000029719 | chr5 | 138069506 | 138069864 |
| ENSMUSG00000029725 | chr5 | 138220793 | 138221189 |
| ENSMUSG00000056014 | chr5 | 139063699 | 139064136 |
| ENSMUSG00000056493 | chr5 | 142878660 | 142879253 |
| ENSMUSG00000039477 | chr5 | 143582562 | 143583450 |
| ENSMUSG00000029580 | chr5 | 143667926 | 143668445 |
| ENSMUSG00000029580 | chr5 | 143682398 | 143682982 |
| ENSMUSG00000029586 | chr5 | 143956387 | 143956901 |
| ENSMUSG00000066621 | chr5 | 144968853 | 144969443 |

|                    |      |           |           |
|--------------------|------|-----------|-----------|
| ENSMUSG00000038780 | chr5 | 145659333 | 145659841 |
| ENSMUSG00000041313 | chr5 | 149210350 | 149210917 |
| ENSMUSG00000079069 | chr5 | 149761611 | 149761943 |
| ENSMUSG00000079069 | chr5 | 149762012 | 149762595 |
| ENSMUSG00000029657 | chr5 | 150439186 | 150439549 |
| ENSMUSG00000016128 | chr5 | 151967120 | 151967412 |
| ENSMUSG00000047735 | chr6 | 3335684   | 3336037   |
| ENSMUSG00000029661 | chr6 | 4455625   | 4456148   |
| ENSMUSG00000029661 | chr6 | 4459413   | 4459943   |
| ENSMUSG00000029661 | chr6 | 4460067   | 4461452   |
| ENSMUSG00000029661 | chr6 | 4461578   | 4461891   |
| ENSMUSG00000029661 | chr6 | 4464800   | 4466594   |
| ENSMUSG00000029661 | chr6 | 4466604   | 4467267   |
| ENSMUSG00000029661 | chr6 | 4468418   | 4471901   |
| ENSMUSG00000029661 | chr6 | 4472330   | 4475649   |
| ENSMUSG00000029661 | chr6 | 4476575   | 4477502   |
| ENSMUSG00000029661 | chr6 | 4477908   | 4480595   |
| ENSMUSG00000029661 | chr6 | 4480650   | 4483037   |
| ENSMUSG00000029661 | chr6 | 4483282   | 4488500   |
| ENSMUSG00000029661 | chr6 | 4489030   | 4489906   |
| ENSMUSG00000048365 | chr6 | 7972001   | 7972495   |
| ENSMUSG00000048365 | chr6 | 8036730   | 8037199   |
| ENSMUSG00000079679 | chr6 | 13322190  | 13322625  |
| ENSMUSG00000052419 | chr6 | 13821036  | 13821906  |
| ENSMUSG00000007655 | chr6 | 17290630  | 17291021  |
| ENSMUSG00000029672 | chr6 | 22450297  | 22450902  |
| ENSMUSG00000029701 | chr6 | 29120931  | 29121417  |
| ENSMUSG00000079654 | chr6 | 29128933  | 29129241  |
| ENSMUSG00000073209 | chr6 | 30930225  | 30930769  |
| ENSMUSG00000065604 | chr6 | 31021112  | 31021626  |
| ENSMUSG00000065604 | chr6 | 31032594  | 31033069  |
| ENSMUSG00000065604 | chr6 | 31035860  | 31036374  |
| ENSMUSG00000065604 | chr6 | 31037495  | 31038077  |
| ENSMUSG00000025609 | chr6 | 31271929  | 31272397  |
| ENSMUSG00000025609 | chr6 | 31282017  | 31282747  |
| ENSMUSG00000025609 | chr6 | 31286433  | 31287006  |
| ENSMUSG00000038759 | chr6 | 35127452  | 35127980  |
| ENSMUSG00000019689 | chr6 | 38482897  | 38484054  |
| ENSMUSG00000002413 | chr6 | 39669489  | 39669802  |
| ENSMUSG00000029860 | chr6 | 42303272  | 42304304  |
| ENSMUSG00000029860 | chr6 | 42305787  | 42306097  |
| ENSMUSG00000029851 | chr6 | 42626058  | 42626581  |
| ENSMUSG00000064945 | chr6 | 47689432  | 47690397  |
| ENSMUSG00000044867 | chr6 | 48692169  | 48692608  |
| ENSMUSG00000029814 | chr6 | 49168116  | 49168439  |
| ENSMUSG00000029821 | chr6 | 50211681  | 50212111  |
| ENSMUSG00000029776 | chr6 | 52589863  | 52590266  |
| ENSMUSG00000029781 | chr6 | 56827503  | 56827990  |
| ENSMUSG00000049232 | chr6 | 59159139  | 59159731  |
| ENSMUSG00000018341 | chr6 | 67380843  | 67381149  |
| ENSMUSG00000037621 | chr6 | 72185294  | 72185704  |
| ENSMUSG00000053907 | chr6 | 72389282  | 72389722  |
| ENSMUSG00000056698 | chr6 | 72548143  | 72548726  |
| ENSMUSG00000055799 | chr6 | 72738189  | 72738571  |
| ENSMUSG00000065072 | chr6 | 73102127  | 73102543  |
| ENSMUSG00000068329 | chr6 | 83004219  | 83004807  |
| ENSMUSG00000034777 | chr6 | 83652186  | 83652528  |
| ENSMUSG00000014748 | chr6 | 83725617  | 83726496  |



|                    |      |           |           |
|--------------------|------|-----------|-----------|
| ENSMUSG00000033788 | chr6 | 84046052  | 84046539  |
| ENSMUSG00000071345 | chr6 | 85081608  | 85082015  |
| ENSMUSG00000033420 | chr6 | 87281286  | 87281860  |
| ENSMUSG00000033420 | chr6 | 87283728  | 87284295  |
| ENSMUSG00000015053 | chr6 | 88154213  | 88154862  |
| ENSMUSG00000055403 | chr6 | 89014991  | 89015577  |
| ENSMUSG00000056643 | chr6 | 90265673  | 90266210  |
| ENSMUSG00000034312 | chr6 | 90656121  | 90656434  |
| ENSMUSG00000064080 | chr6 | 91151598  | 91152123  |
| ENSMUSG00000034203 | chr6 | 91423317  | 91423808  |
| ENSMUSG00000030096 | chr6 | 91567034  | 91567645  |
| ENSMUSG00000030096 | chr6 | 91596895  | 91597605  |
| ENSMUSG00000030059 | chr6 | 97128664  | 97129134  |
| ENSMUSG00000044086 | chr6 | 97297974  | 97298306  |
| ENSMUSG00000030067 | chr6 | 99166579  | 99166928  |
| ENSMUSG00000072872 | chr6 | 100236344 | 100236868 |
| ENSMUSG00000079446 | chr6 | 100655032 | 100655540 |
| ENSMUSG00000043024 | chr6 | 108520653 | 108521192 |
| ENSMUSG00000078282 | chr6 | 112773254 | 112773698 |
| ENSMUSG00000030257 | chr6 | 112856009 | 112856465 |
| ENSMUSG00000030286 | chr6 | 113481420 | 113481872 |
| ENSMUSG00000030314 | chr6 | 114592866 | 114593472 |
| ENSMUSG00000030315 | chr6 | 114861345 | 114861931 |
| ENSMUSG00000030316 | chr6 | 114992643 | 114993021 |
| ENSMUSG00000054488 | chr6 | 117410895 | 117411524 |
| ENSMUSG00000042087 | chr6 | 117866945 | 117867277 |
| ENSMUSG00000072623 | chr6 | 118427790 | 118428290 |
| ENSMUSG00000041477 | chr6 | 118852905 | 118853340 |
| ENSMUSG00000041477 | chr6 | 119057864 | 119058369 |
| ENSMUSG00000030019 | chr6 | 119430069 | 119431092 |
| ENSMUSG00000030170 | chr6 | 119471706 | 119472423 |
| ENSMUSG00000040669 | chr6 | 122290170 | 122290598 |
| ENSMUSG00000072772 | chr6 | 124690512 | 124690866 |
| ENSMUSG00000030122 | chr6 | 124870148 | 124870658 |
| ENSMUSG00000038271 | chr6 | 125096756 | 125097182 |
| ENSMUSG00000067702 | chr6 | 125241249 | 125241694 |
| ENSMUSG00000038167 | chr6 | 125327453 | 125328244 |
| ENSMUSG00000001930 | chr6 | 125570731 | 125571233 |
| ENSMUSG00000030352 | chr6 | 128093711 | 128094303 |
| ENSMUSG00000030199 | chr6 | 133997186 | 133997681 |
| ENSMUSG00000042992 | chr6 | 134646028 | 134646320 |
| ENSMUSG00000030204 | chr6 | 134933517 | 134933984 |
| ENSMUSG00000030204 | chr6 | 134961302 | 134962007 |
| ENSMUSG00000079274 | chr6 | 137467973 | 137468530 |
| ENSMUSG00000015766 | chr6 | 137508666 | 137509152 |
| ENSMUSG00000084477 | chr6 | 140439591 | 140439980 |
| ENSMUSG00000030232 | chr6 | 140591453 | 140591989 |
| ENSMUSG00000079262 | chr6 | 142168289 | 142168706 |
| ENSMUSG00000080637 | chr6 | 144589077 | 144589707 |
| ENSMUSG00000072677 | chr6 | 144735458 | 144735932 |
| ENSMUSG00000030268 | chr6 | 145024238 | 145024783 |
| ENSMUSG00000043541 | chr6 | 145135726 | 145136276 |
| ENSMUSG00000040250 | chr6 | 146526361 | 146526972 |
| ENSMUSG00000040234 | chr6 | 146582671 | 146583738 |
| ENSMUSG00000040187 | chr6 | 146716829 | 146717219 |
| ENSMUSG00000040187 | chr6 | 146725077 | 146725539 |
| ENSMUSG00000030292 | chr6 | 146773478 | 146774073 |
| ENSMUSG00000040163 | chr6 | 146934972 | 146935488 |

|                    |      |           |           |
|--------------------|------|-----------|-----------|
| ENSMUSG00000032712 | chr6 | 149258193 | 149258570 |
| ENSMUSG00000054753 | chr7 | 3170204   | 3170585   |
| ENSMUSG00000019254 | chr7 | 4453568   | 4454101   |
| ENSMUSG00000030386 | chr7 | 13063811  | 13064267  |
| ENSMUSG00000054715 | chr7 | 13482833  | 13483242  |
| ENSMUSG00000033916 | chr7 | 13619783  | 13620441  |
| ENSMUSG00000041560 | chr7 | 16533772  | 16534135  |
| ENSMUSG00000006024 | chr7 | 16683894  | 16684202  |
| ENSMUSG00000006019 | chr7 | 16791327  | 16791854  |
| ENSMUSG00000044030 | chr7 | 19589211  | 19589447  |
| ENSMUSG00000044030 | chr7 | 19589624  | 19590313  |
| ENSMUSG00000030410 | chr7 | 19660866  | 19661253  |
| ENSMUSG00000040857 | chr7 | 26033481  | 26033783  |
| ENSMUSG00000040390 | chr7 | 28459688  | 28460158  |
| ENSMUSG00000047586 | chr7 | 29355161  | 29355689  |
| ENSMUSG00000053522 | chr7 | 29634931  | 29635371  |
| ENSMUSG00000037166 | chr7 | 30077635  | 30077951  |
| ENSMUSG00000001794 | chr7 | 30983787  | 30984131  |
| ENSMUSG00000036882 | chr7 | 31317895  | 31318818  |
| ENSMUSG00000074166 | chr7 | 48754974  | 48755481  |
| ENSMUSG00000014418 | chr7 | 54050693  | 54051079  |
| ENSMUSG00000052512 | chr7 | 56467998  | 56468568  |
| ENSMUSG00000065585 | chr7 | 71337594  | 71338165  |
| ENSMUSG00000033458 | chr7 | 71525282  | 71526165  |
| ENSMUSG00000030516 | chr7 | 72515785  | 72516125  |
| ENSMUSG00000078681 | chr7 | 72844400  | 72845175  |
| ENSMUSG00000042659 | chr7 | 75892500  | 75892948  |
| ENSMUSG00000062383 | chr7 | 77504714  | 77505118  |
| ENSMUSG00000078671 | chr7 | 80722591  | 80723006  |
| ENSMUSG00000025790 | chr7 | 81569455  | 81569732  |
| ENSMUSG00000030547 | chr7 | 86867178  | 86867591  |
| ENSMUSG00000039062 | chr7 | 87025719  | 87026372  |
| ENSMUSG00000030638 | chr7 | 89413176  | 89413585  |
| ENSMUSG00000070469 | chr7 | 89570924  | 89571386  |
| ENSMUSG00000070469 | chr7 | 89683611  | 89684028  |
| ENSMUSG00000001741 | chr7 | 90847964  | 90848549  |
| ENSMUSG00000052353 | chr7 | 91166657  | 91167162  |
| ENSMUSG00000052353 | chr7 | 91176875  | 91177238  |
| ENSMUSG00000039405 | chr7 | 96665805  | 96666279  |
| ENSMUSG00000039391 | chr7 | 97037660  | 97038000  |
| ENSMUSG00000062797 | chr7 | 97089597  | 97090014  |
| ENSMUSG00000030643 | chr7 | 99925617  | 99925990  |
| ENSMUSG00000030760 | chr7 | 105474927 | 105475618 |
| ENSMUSG00000070436 | chr7 | 106500431 | 106501104 |
| ENSMUSG00000070436 | chr7 | 106501446 | 106502364 |
| ENSMUSG00000070436 | chr7 | 106508768 | 106509032 |
| ENSMUSG00000047767 | chr7 | 108449646 | 108451045 |
| ENSMUSG00000037049 | chr7 | 112702685 | 112703272 |
| ENSMUSG00000073867 | chr7 | 117204657 | 117205337 |
| ENSMUSG00000030788 | chr7 | 117967070 | 117967954 |
| ENSMUSG00000030759 | chr7 | 120657726 | 120658166 |
| ENSMUSG00000084492 | chr7 | 123874752 | 123875342 |
| ENSMUSG00000033917 | chr7 | 125849154 | 125849748 |
| ENSMUSG00000046096 | chr7 | 127820758 | 127821085 |
| ENSMUSG00000030750 | chr7 | 132613406 | 132613886 |
| ENSMUSG00000030722 | chr7 | 133540387 | 133540898 |
| ENSMUSG00000042502 | chr7 | 134339494 | 134340023 |
| ENSMUSG00000045639 | chr7 | 134758465 | 134758889 |

|                    |      |           |           |
|--------------------|------|-----------|-----------|
| ENSMUSG00000030811 | chr7 | 134889262 | 134889883 |
| ENSMUSG00000030802 | chr7 | 135047327 | 135047796 |
| ENSMUSG00000030780 | chr7 | 135492051 | 135492569 |
| ENSMUSG00000055319 | chr7 | 135888255 | 135888690 |
| ENSMUSG00000030849 | chr7 | 137406432 | 137407137 |
| ENSMUSG00000030852 | chr7 | 137792624 | 137793194 |
| ENSMUSG00000040268 | chr7 | 137977870 | 137978283 |
| ENSMUSG00000066979 | chr7 | 138703130 | 138703921 |
| ENSMUSG00000073814 | chr7 | 139507141 | 139507728 |
| ENSMUSG00000030986 | chr7 | 141047956 | 141048302 |
| ENSMUSG00000041836 | chr7 | 142802855 | 142803356 |
| ENSMUSG00000025477 | chr7 | 146575469 | 146575911 |
| ENSMUSG00000025492 | chr7 | 148195969 | 148196498 |
| ENSMUSG00000031098 | chr7 | 149621199 | 149622155 |
| ENSMUSG00000052281 | chr7 | 150199684 | 150200202 |
| ENSMUSG00000052281 | chr7 | 150201733 | 150202112 |
| ENSMUSG00000009545 | chr7 | 150324813 | 150325178 |
| ENSMUSG00000059119 | chr7 | 150734705 | 150735180 |
| ENSMUSG00000048965 | chr7 | 150983773 | 150984109 |
| ENSMUSG00000031073 | chr7 | 152082426 | 152083049 |
| ENSMUSG00000070348 | chr7 | 152139881 | 152140238 |
| ENSMUSG00000070348 | chr7 | 152226734 | 152227502 |
| ENSMUSG00000004567 | chr8 | 3500017   | 3500579   |
| ENSMUSG00000019470 | chr8 | 3620996   | 3621631   |
| ENSMUSG00000040396 | chr8 | 9977382   | 9978188   |
| ENSMUSG00000039057 | chr8 | 10130940  | 10131464  |
| ENSMUSG00000031502 | chr8 | 11210498  | 11211047  |
| ENSMUSG00000031502 | chr8 | 11212340  | 11212875  |
| ENSMUSG00000031502 | chr8 | 11213334  | 11213875  |
| ENSMUSG00000031502 | chr8 | 11214437  | 11214817  |
| ENSMUSG00000031502 | chr8 | 11216488  | 11217010  |
| ENSMUSG00000031502 | chr8 | 11217743  | 11218189  |
| ENSMUSG00000031502 | chr8 | 11218404  | 11219398  |
| ENSMUSG00000031502 | chr8 | 11219963  | 11220422  |
| ENSMUSG00000031502 | chr8 | 11220717  | 11221588  |
| ENSMUSG00000031502 | chr8 | 11231650  | 11232196  |
| ENSMUSG00000031502 | chr8 | 11236161  | 11236785  |
| ENSMUSG00000031502 | chr8 | 11242439  | 11243142  |
| ENSMUSG00000031502 | chr8 | 11245485  | 11246068  |
| ENSMUSG00000031505 | chr8 | 11510003  | 11510451  |
| ENSMUSG00000074473 | chr8 | 12247892  | 12248188  |
| ENSMUSG00000038416 | chr8 | 13757395  | 13757833  |
| ENSMUSG00000071176 | chr8 | 14920538  | 14921219  |
| ENSMUSG00000059078 | chr8 | 19784282  | 19784932  |
| ENSMUSG00000031482 | chr8 | 23508462  | 23508910  |
| ENSMUSG00000008892 | chr8 | 23703984  | 23704461  |
| ENSMUSG00000031557 | chr8 | 26181480  | 26181852  |
| ENSMUSG00000054823 | chr8 | 26737558  | 26738067  |
| ENSMUSG00000031483 | chr8 | 28134828  | 28135323  |
| ENSMUSG00000039720 | chr8 | 28323562  | 28323984  |
| ENSMUSG00000083588 | chr8 | 32540054  | 32540414  |
| ENSMUSG00000046794 | chr8 | 36281301  | 36281808  |
| ENSMUSG00000031596 | chr8 | 41977425  | 41977900  |
| ENSMUSG00000031592 | chr8 | 42336077  | 42336577  |
| ENSMUSG00000031562 | chr8 | 49182580  | 49183292  |
| ENSMUSG00000031604 | chr8 | 67212545  | 67212877  |
| ENSMUSG00000074292 | chr8 | 69903980  | 69904643  |
| ENSMUSG00000051147 | chr8 | 70018191  | 70018761  |

|                    |      |           |           |
|--------------------|------|-----------|-----------|
| ENSMUSG00000030465 | chr8 | 70420674  | 70421137  |
| ENSMUSG00000044006 | chr8 | 72408073  | 72408544  |
| ENSMUSG00000002342 | chr8 | 72695958  | 72696588  |
| ENSMUSG00000003573 | chr8 | 72786515  | 72786889  |
| ENSMUSG00000070002 | chr8 | 73085866  | 73086226  |
| ENSMUSG00000000792 | chr8 | 73417339  | 73418487  |
| ENSMUSG00000074252 | chr8 | 73445721  | 73446329  |
| ENSMUSG00000002396 | chr8 | 73893004  | 73893377  |
| ENSMUSG00000034880 | chr8 | 73988361  | 73988856  |
| ENSMUSG00000034829 | chr8 | 74086617  | 74087016  |
| ENSMUSG00000052794 | chr8 | 74967764  | 74968135  |
| ENSMUSG00000037148 | chr8 | 80041509  | 80041884  |
| ENSMUSG00000019464 | chr8 | 86190592  | 86191050  |
| ENSMUSG00000065483 | chr8 | 86713295  | 86713848  |
| ENSMUSG00000001911 | chr8 | 87298905  | 87299290  |
| ENSMUSG00000001911 | chr8 | 87305484  | 87305910  |
| ENSMUSG00000001911 | chr8 | 87308723  | 87309219  |
| ENSMUSG00000033751 | chr8 | 87356323  | 87356661  |
| ENSMUSG00000041203 | chr8 | 87550355  | 87550855  |
| ENSMUSG00000031700 | chr8 | 88016660  | 88017196  |
| ENSMUSG00000036879 | chr8 | 88461663  | 88461977  |
| ENSMUSG00000045333 | chr8 | 90317723  | 90318225  |
| ENSMUSG00000056608 | chr8 | 93337515  | 93337941  |
| ENSMUSG00000056608 | chr8 | 93352889  | 93353353  |
| ENSMUSG00000031667 | chr8 | 93716675  | 93717219  |
| ENSMUSG00000033282 | chr8 | 93837095  | 93837904  |
| ENSMUSG00000055932 | chr8 | 93905492  | 93906053  |
| ENSMUSG00000031738 | chr8 | 95137275  | 95137747  |
| ENSMUSG00000031751 | chr8 | 96499874  | 96500237  |
| ENSMUSG00000033009 | chr8 | 96560953  | 96561444  |
| ENSMUSG00000031673 | chr8 | 105307746 | 105308180 |
| ENSMUSG00000063696 | chr8 | 105389267 | 105389723 |
| ENSMUSG00000031871 | chr8 | 106435676 | 106436277 |
| ENSMUSG00000031871 | chr8 | 106552500 | 106553094 |
| ENSMUSG00000041308 | chr8 | 109480928 | 109481332 |
| ENSMUSG00000065439 | chr8 | 110070504 | 110071108 |
| ENSMUSG00000031955 | chr8 | 114239936 | 114240434 |
| ENSMUSG00000031758 | chr8 | 119197659 | 119198076 |
| ENSMUSG00000034390 | chr8 | 119868577 | 119869001 |
| ENSMUSG00000034330 | chr8 | 119978517 | 119978953 |
| ENSMUSG00000034330 | chr8 | 120053883 | 120054313 |
| ENSMUSG00000034112 | chr8 | 122210145 | 122210614 |
| ENSMUSG00000042812 | chr8 | 123608367 | 123609091 |
| ENSMUSG00000064642 | chr8 | 124192737 | 124193557 |
| ENSMUSG00000040010 | chr8 | 124427380 | 124427764 |
| ENSMUSG00000025316 | chr8 | 124473684 | 124474277 |
| ENSMUSG00000006585 | chr8 | 125080254 | 125080726 |
| ENSMUSG00000006585 | chr8 | 125092625 | 125093805 |
| ENSMUSG00000015016 | chr8 | 125299072 | 125299626 |
| ENSMUSG00000065915 | chr8 | 125528753 | 125529088 |
| ENSMUSG00000031967 | chr8 | 126001645 | 126002160 |
| ENSMUSG00000039509 | chr8 | 126472914 | 126473429 |
| ENSMUSG00000031977 | chr8 | 126814878 | 126815340 |
| ENSMUSG00000074026 | chr8 | 129037527 | 129038194 |
| ENSMUSG00000074026 | chr8 | 129049491 | 129049994 |
| ENSMUSG00000051495 | chr8 | 129189550 | 129189915 |
| ENSMUSG00000074025 | chr8 | 129306177 | 129306705 |
| ENSMUSG00000072481 | chr8 | 129510283 | 129510864 |

|                    |      |           |           |
|--------------------|------|-----------|-----------|
| ENSMUSG00000025812 | chr8 | 129587766 | 129588283 |
| ENSMUSG00000084523 | chr8 | 130743410 | 130743817 |
| ENSMUSG00000041124 | chr9 | 4375891   | 4376343   |
| ENSMUSG00000047619 | chr9 | 6270041   | 6270421   |
| ENSMUSG00000050912 | chr9 | 7764469   | 7764941   |
| ENSMUSG00000032009 | chr9 | 14045592  | 14045990  |
| ENSMUSG00000032172 | chr9 | 20555909  | 20556391  |
| ENSMUSG0000004098  | chr9 | 20589542  | 20590200  |
| ENSMUSG0000004098  | chr9 | 20591184  | 20591770  |
| ENSMUSG0000004098  | chr9 | 20592886  | 20593203  |
| ENSMUSG0000004098  | chr9 | 20597788  | 20598233  |
| ENSMUSG00000032177 | chr9 | 20986946  | 20987204  |
| ENSMUSG00000032194 | chr9 | 21591370  | 21591715  |
| ENSMUSG00000031963 | chr9 | 22914397  | 22914622  |
| ENSMUSG00000008429 | chr9 | 24956166  | 24956714  |
| ENSMUSG00000032035 | chr9 | 32522150  | 32522516  |
| ENSMUSG00000032036 | chr9 | 34205504  | 34205927  |
| ENSMUSG00000032040 | chr9 | 34970418  | 34971152  |
| ENSMUSG00000038119 | chr9 | 35167249  | 35167781  |
| ENSMUSG00000032122 | chr9 | 37062762  | 37063101  |
| ENSMUSG00000001948 | chr9 | 37418294  | 37418643  |
| ENSMUSG00000040111 | chr9 | 40345318  | 40345760  |
| ENSMUSG00000032024 | chr9 | 40494472  | 40495076  |
| ENSMUSG00000032024 | chr9 | 40551429  | 40551666  |
| ENSMUSG00000032020 | chr9 | 40996274  | 40996630  |
| ENSMUSG00000032112 | chr9 | 44214684  | 44215184  |
| ENSMUSG00000063382 | chr9 | 44301815  | 44302345  |
| ENSMUSG00000063382 | chr9 | 44315949  | 44316375  |
| ENSMUSG00000048537 | chr9 | 44529146  | 44529474  |
| ENSMUSG00000039438 | chr9 | 44610756  | 44611133  |
| ENSMUSG00000002028 | chr9 | 44689255  | 44690011  |
| ENSMUSG00000034135 | chr9 | 45821812  | 45822391  |
| ENSMUSG00000037971 | chr9 | 50576109  | 50576714  |
| ENSMUSG00000061559 | chr9 | 54590239  | 54590799  |
| ENSMUSG00000032733 | chr9 | 56774146  | 56774551  |
| ENSMUSG00000032334 | chr9 | 58146773  | 58147594  |
| ENSMUSG00000032294 | chr9 | 59507060  | 59507526  |
| ENSMUSG00000032292 | chr9 | 60055565  | 60055865  |
| ENSMUSG00000032280 | chr9 | 61221494  | 61221914  |
| ENSMUSG00000053641 | chr9 | 64659675  | 64660016  |
| ENSMUSG00000050721 | chr9 | 65426043  | 65426833  |
| ENSMUSG00000065387 | chr9 | 65674607  | 65675089  |
| ENSMUSG00000050503 | chr9 | 66359553  | 66360035  |
| ENSMUSG00000032376 | chr9 | 66500044  | 66500427  |
| ENSMUSG00000079486 | chr9 | 66965765  | 66966094  |
| ENSMUSG00000034910 | chr9 | 72773416  | 72773948  |
| ENSMUSG00000007656 | chr9 | 74885065  | 74885626  |
| ENSMUSG00000058587 | chr9 | 75375031  | 75375714  |
| ENSMUSG00000032355 | chr9 | 77087093  | 77087586  |
| ENSMUSG00000065037 | chr9 | 78023728  | 78024271  |
| ENSMUSG00000074179 | chr9 | 78143950  | 78144441  |
| ENSMUSG00000032332 | chr9 | 79449810  | 79450221  |
| ENSMUSG00000032332 | chr9 | 79451994  | 79452539  |
| ENSMUSG00000032332 | chr9 | 79455974  | 79456507  |
| ENSMUSG00000032332 | chr9 | 79568708  | 79569275  |
| ENSMUSG00000032251 | chr9 | 82723191  | 82723772  |
| ENSMUSG00000066456 | chr9 | 83039936  | 83040443  |
| ENSMUSG00000062358 | chr9 | 85698691  | 85699046  |

|                    |      |           |           |
|--------------------|------|-----------|-----------|
| ENSMUSG00000056031 | chr9 | 85841943  | 85842714  |
| ENSMUSG00000033419 | chr9 | 86775654  | 86776079  |
| ENSMUSG00000037410 | chr9 | 90150924  | 90151159  |
| ENSMUSG00000032369 | chr9 | 92120546  | 92120852  |
| ENSMUSG00000050397 | chr9 | 98855534  | 98855861  |
| ENSMUSG00000056267 | chr9 | 99142616  | 99143241  |
| ENSMUSG00000044244 | chr9 | 100371288 | 100371748 |
| ENSMUSG00000074116 | chr9 | 102631620 | 102632613 |
| ENSMUSG00000074116 | chr9 | 102637015 | 102637632 |
| ENSMUSG00000084659 | chr9 | 105624980 | 105625383 |
| ENSMUSG00000043719 | chr9 | 105660452 | 105660938 |
| ENSMUSG00000064517 | chr9 | 106898763 | 106899134 |
| ENSMUSG00000037190 | chr9 | 107443919 | 107444432 |
| ENSMUSG00000010054 | chr9 | 107465119 | 107465728 |
| ENSMUSG00000070285 | chr9 | 107504525 | 107504789 |
| ENSMUSG00000034837 | chr9 | 107582661 | 107583062 |
| ENSMUSG00000039952 | chr9 | 108142293 | 108142641 |
| ENSMUSG00000025651 | chr9 | 108838904 | 108839248 |
| ENSMUSG00000049699 | chr9 | 108879699 | 108880798 |
| ENSMUSG00000032492 | chr9 | 110632389 | 110632742 |
| ENSMUSG00000045594 | chr9 | 114337339 | 114337812 |
| ENSMUSG00000039607 | chr9 | 117160751 | 117161297 |
| ENSMUSG00000061536 | chr9 | 121614277 | 121614769 |
| ENSMUSG00000046269 | chrX | 6953053   | 6953614   |
| ENSMUSG00000082090 | chrX | 12806851  | 12807432  |
| ENSMUSG00000079641 | chrX | 34625032  | 34625397  |
| ENSMUSG00000031371 | chrX | 70706324  | 70706657  |
| ENSMUSG00000031375 | chrX | 70729350  | 70729843  |
| ENSMUSG00000031376 | chrX | 70741904  | 70742390  |
| ENSMUSG00000046032 | chrX | 98417695  | 98418359  |
| ENSMUSG00000073037 | chrX | 99232874  | 99233213  |
| ENSMUSG00000051323 | chrX | 130269392 | 130269942 |
| ENSMUSG00000083646 | chrX | 137328238 | 137328546 |
| ENSMUSG00000081217 | chrX | 138034532 | 138034895 |
