# Supplementary material for: Prdm5 Regulates Collagen Gene Transcription by Association with RNA Polymerase II in Developing Bone
Source: PubMed Central journal article supplement (PMC3349747; doi:10.1371/journal.pgen.1002711), 2012-05-10
Supplement: pgen.1002711.s008.pdf [file pgen.1002711.s008.pdf]

Galli\_Table S2

| Total | Total density (mg/mm <sup>2</sup> ) | Males (n=10) |           | Females (n=10) |           | Total content (mg) | Males (n=10) |           | Females (n=10) |           | Total area (mm <sup>2</sup> ) | Males (n=10) |           | Females (n=10) |           |
|-------|-------------------------------------|--------------|-----------|----------------|-----------|--------------------|--------------|-----------|----------------|-----------|-------------------------------|--------------|-----------|----------------|-----------|
|       |                                     | +/+          | LacZ/LacZ | +/+            | LacZ/LacZ |                    | +/+          | LacZ/LacZ | +/+            | LacZ/LacZ |                               | +/+          | LacZ/LacZ | +/+            | LacZ/LacZ |
|       | Average                             | +/+          | 440.08    | 386.49         | Average   | +/+                | 1.80         | 1.28      | Average        | +/+       | 4.07                          | 3.30         |           |                |           |
|       | Average                             | LacZ/LacZ    | 378.20    | 355.92         | Average   | LacZ/LacZ          | 1.32         | 1.10      | Average        | LacZ/LacZ | 3.48                          | 3.09         |           |                |           |
|       | Stdev                               | +/+          | 35.49     | 11.34          | Stdev     | +/+                | 0.24         | 0.09      | Stdev          | +/+       | 0.34                          | 0.15         |           |                |           |
|       | Stdev                               | LacZ/LacZ    | 44.12     | 15.76          | Stdev     | LacZ/LacZ          | 0.24         | 0.09      | Stdev          | LacZ/LacZ | 0.27                          | 0.20         |           |                |           |
|       | pvalue                              |              | 0.00467   | 0.00018        | pvalue    |                    | 0.00082      | 0.00037   | pvalue         |           | 0.00129                       | 0.01902      |           |                |           |

| Cortical | Cortical density (mg/mm <sup>2</sup> ) | Males (n=10) |           | Females (n=10) |           | Cortical content (mg) | Males (n=10) |           | Females (n=10) |           | Cortical area (mm <sup>2</sup> ) | Males (n=10) |           | Females (n=10) |           | Periosteal circumference (mm) | Males (n=10) |           | Females (n=10) |  |
|----------|----------------------------------------|--------------|-----------|----------------|-----------|-----------------------|--------------|-----------|----------------|-----------|----------------------------------|--------------|-----------|----------------|-----------|-------------------------------|--------------|-----------|----------------|--|
|          |                                        | +/+          | LacZ/LacZ | +/+            | LacZ/LacZ |                       | +/+          | LacZ/LacZ | +/+            | LacZ/LacZ |                                  | +/+          | LacZ/LacZ | +/+            | LacZ/LacZ |                               | +/+          | LacZ/LacZ |                |  |
|          | Average                                | +/+          | 643.29    | 656.55         | Average   | +/+                   | 1.22         | 0.93      | Average        | +/+       | 1.89                             | 1.42         | Average   | +/+            | 7.15      | 6.44                          |              |           |                |  |
|          | Average                                | LacZ/LacZ    | 605.20    | 623.02         | Average   | LacZ/LacZ             | 0.85         | 0.77      | Average        | LacZ/LacZ | 1.40                             | 1.23         | Average   | LacZ/LacZ      | 6.60      | 6.23                          |              |           |                |  |
|          | Stdev                                  | +/+          | 21.97     | 16.16          | Stdev     | +/+                   | 0.22         | 0.07      | Stdev          | +/+       | 0.32                             | 0.09         | Stdev     | +/+            | 0.31      | 0.17                          |              |           |                |  |
|          | Stdev                                  | LacZ/LacZ    | 37.82     | 14.46          | Stdev     | LacZ/LacZ             | 0.17         | 0.06      | Stdev          | LacZ/LacZ | 0.23                             | 0.08         | Stdev     | LacZ/LacZ      | 0.26      | 0.21                          |              |           |                |  |
|          | pvalue                                 |              | 0.01361   | 0.00003        | pvalue    |                       | 0.00140      | 0.00007   | pvalue         |           | 0.00208                          | 0.00016      | pvalue    |                | 0.00124   | 0.01962                       |              |           |                |  |

| Trabecular | Trabecular density (mg/mm <sup>2</sup> ) | Males (n=10) |           | Females (n=10) |           | Trabecular content (mg) | Males (n=10) |           | Females (n=10) |           | Trabecular area (mm <sup>2</sup> ) | Males (n=10) |           | Females (n=10) |           | Endosteal circumference (mm) | Males (n=10) |           | Females (n=10) |  |
|------------|------------------------------------------|--------------|-----------|----------------|-----------|-------------------------|--------------|-----------|----------------|-----------|------------------------------------|--------------|-----------|----------------|-----------|------------------------------|--------------|-----------|----------------|--|
|            |                                          | +/+          | LacZ/LacZ | +/+            | LacZ/LacZ |                         | +/+          | LacZ/LacZ | +/+            | LacZ/LacZ |                                    | +/+          | LacZ/LacZ | +/+            | LacZ/LacZ |                              | +/+          | LacZ/LacZ |                |  |
|            | Average                                  | +/+          | 266.23    | 182.49         | Average   | +/+                     | 0.58         | 0.34      | Average        | +/+       | 2.19                               | 1.88         | Average   | +/+            | 6.58      | 5.92                         |              |           |                |  |
|            | Average                                  | LacZ/LacZ    | 227.03    | 177.80         | Average   | LacZ/LacZ               | 0.47         | 0.33      | Average        | LacZ/LacZ | 2.08                               | 1.86         | Average   | LacZ/LacZ      | 6.24      | 5.87                         |              |           |                |  |
|            | Stdev                                    | +/+          | 20.03     | 9.63           | Stdev     | +/+                     | 0.09         | 0.03      | Stdev          | +/+       | 0.26                               | 0.09         | Stdev     | +/+            | 0.32      | 0.15                         |              |           |                |  |
|            | Stdev                                    | LacZ/LacZ    | 32.58     | 9.26           | Stdev     | LacZ/LacZ               | 0.08         | 0.04      | Stdev          | LacZ/LacZ | 0.13                               | 0.15         | Stdev     | LacZ/LacZ      | 0.18      | 0.21                         |              |           |                |  |
|            | pvalue                                   |              | 0.00845   | 0.30614        | pvalue    |                         | 0.01218      | 0.34852   | pvalue         |           | 0.30595                            | 0.63877      | pvalue    |                | 0.01944   | 0.50937                      |              |           |                |  |
