# Supplementary material for: Prdm5 Regulates Collagen Gene Transcription by Association with RNA Polymerase II in Developing Bone
Source: PubMed Central journal article supplement (PMC3349747; doi:10.1371/journal.pgen.1002711), 2012-05-10
Supplement: pgen.1002711.s009.pdf [file pgen.1002711.s009.pdf]

## ChIP-qPCR primers

| Gene associated | Approx position (relative to TSS in Kb) | Forward sequence              | Reverse sequence            |
|-----------------|-----------------------------------------|-------------------------------|-----------------------------|
| actb            | TSS                                     | CCCAACACACCTAGCAAAATTAGAACCAC | CCTGGATTGAATGGACAGAGACTCACT |
| adamts9         | TSS                                     | CCTTTTCTGGATGCCTTAACAC        | CCTTCACAGTGTTCCTCTCCT       |
| bgn             | +0.5                                    | CCCAGTTGCTAAGCTCACCTAT        | CCATGAAGGGATAGGACTATTGG     |
| col10a1         | +5.1                                    | AGGGTTACCAGGACAAAAGGT         | AGGCACTCCTTTAGCTCTACA       |
| col11a1         | +3.5                                    | TGCCTCAGAAGTCTGTTAGA          | AGAGCATGCCTGCTGTTTTAAT      |
| col11a2         | +19                                     | CATTACCTTCCCTTGTTCG           | GCAGTCTCTAGTGGGGAGAAGA      |
| col12a1         | -2.2                                    | TGTTTTCTTAACCTCCCTTGGAA       | ACAGGAGTAAGACCCACAGGAA      |
| col13a1         | +6.2                                    | CATGATCAATAACAAGCCTGGA        | CCTCCTCTGCATAACCCTTAAA      |
| col14a1         | +2.7                                    | GGTATCCTCTCCTTCTGCTTCA        | AAACGACTCCAGGAACACTGAC      |
| col15a1         | +79                                     | CCAGGGCTAAAAGGAGAACAG         | GGGAATCCTTTAAACGCTCAATG     |
| col16a1         | +10                                     | CACGGGTAAAGTACCCTAACCAA       | AAAGACCCAGGTACCCTTAGAA      |
| col17a1         | +41                                     | ATGAGAGGTCTCCACACTGAT         | CCCAGGGTCTGACTACAGAAAC      |
| col18a1         | +33                                     | TCCATGCTTAATCCCTTCTA          | CCGGTAAGTACTGCTGCTCCTT      |
| col19a1         | +60                                     | CGTACCTGAATACCTGGCTCTC        | GAAATGGTGTGATAGGGGTTTTC     |
| col1a1          | TSS                                     | GCTCTCCATCAAGATGGTATAAAAG     | GACCCCTAGACATGTAGACTCTTTGC  |
| col1a1          | +1.5                                    | GGAAAGATACGGTACGGTTCTG        | AGTTTTGGTGATACCTGGGAAAG     |
| col1a1          | +3.2                                    | ACTTTGCTTCCAGATGTCCTA         | GACATCATTGGCCTTTCTCTTC      |
| col1a1          | +6.2                                    | AGGTCCCAAGGGTAACAGTGT         | CTCGCAAGTGTATGTTTCTCCA      |
| col1a1          | +8.9                                    | ATTAACGCGAAAAGGGAGGACTT       | GCCAGAGTATTCCAGCAAGTGT      |
| col1a1          | +11                                     | ACTTCTGACCACCAATGTTCT         | ATACATGTCTACCCCATCCTC       |
| col1a1          | +14                                     | ACCTGGAACCTTGATCTCCTT         | AGGCAGGAAGCTGAAGTCATAA      |
| col1a1          | +15.5                                   | GGTCTCTTGCCTTGAAGACCTA        | GACTTAAATTTGGGAGCAATG       |
| col1a2          | +4.6                                    | TGGTCCCAAGATTGCTCTAA          | GGGACCATCAACACCATCTCT       |
| col20a1         | +14                                     | GACTTTCAGGCTTGCAGTAAT         | CCCTGTGAGGGAACAGGATAG       |
| col22a1         | +135                                    | CAGTGTCCAGGGTGTGTACT          | ACCCTCTAACATTGGCTGACAT      |
| col23a1         | +278                                    | CAAGGTCAGTGTGCTGAACTC         | AGGATGAAGTTCGGGGTACATA      |
| col24a1         | +180                                    | TGTCATCCACAGGGTGATAAAG        | CCAGTGAGTCAAGTCTGAAAAG      |
| col25a1         | +382                                    | AGCACAGCTTCTAGCAATGGT         | CCTTGAATAATACCTGTTCTCCA     |
| col27a1         | +85                                     | GTCAAGGGAGAAGCATAATGGA        | GCCAACAGTCCCTGCTATAATC      |
| col28a1         | +105                                    | TCTTACAGACACTGTTCCCTGGT       | GGCCTCTGGAAGAAGGTAATC       |
| col2a1          | +6.5                                    | CACCCCTTGACAGGAAGAGAAA        | GGTGAGCAGACAGCAACAATA       |
| col3a1          | +31                                     | AAATCACCCCTCCAACTGGTAA        | CTTACATCCCTCCAGGTTCCAC      |
| col4a1          | +70                                     | GGTGACATCACCATCACCATAA        | CCCAGATATGGCACTACCTGTT      |
| col4a2          | +113                                    | TATGAAGGAGTTGTCCCTTGT         | TGGTCACATGTGCATGAATCTA      |
| col4a3          | +82                                     | TCCAGGATGTCCAGGTAAGAT         | CCATGCTCCTATGCCTGAGTAT      |
| col4a4          | +75                                     | CAAAACAAGCACAGAGAGGCTTA       | CTCAGTGAGTGTGTGCTGTTCA      |
| col4a5          | +176                                    | GGTATGAATGGTCTCCTGGTA         | ATGAGCACCTGTTTCTTCTTC       |
| col4a6          | +290                                    | GCATTTGTGAGGTATGGACAAA        | AAACACTTGGCATTCTGGAAAG      |
| col5a1          | +1.1                                    | GCTCTCCTTAGCTTAGCTGGTG        | GCCAGAAAAGCAGGAGAAGAATA     |
| col5a2          | +81                                     | GCCATGGGCTGACATACTTATT        | TATGTTGCTTTCCTTGTCTCA       |
| col5a3          | +27                                     | CCCACGTCACCCTAGAACATA         | TGACCAAGGGTCTTGTCTATC       |
| col6a1          | +9                                      | ATGGAGAAGCAAAATGGAGCTA        | GAGCACTACGTGGAGTCAATTTG     |
| col6a2          | -10                                     | CCGTAAGTGGCAGAGTTTCATT        | AGAAGCACAAAGGCTTTTCCTGA     |
| col6a3          | +18                                     | GAACCTACCCTTCGACCTCTGA        | TGATGTGCTACTTCTGGCTCT       |
| col6a6          | +29                                     | AAAAATGGAAGGACAGCAGTGT        | CAAAGGGCCCTAAGGTAAGGACT     |
| col7a1          | +24                                     | CTGGACTCAAAGGAGACAAGGT        | TCCCTAGAGTTCACCCAGGAATA     |
| col8a1          | +3.4                                    | GGGACCTACTTCACCAAGAAA         | AGAAGGTGGAGTTGTAGGACCA      |
| col8a2          | +24                                     | GAGGAGACCAAGGGCCTAAT          | CCCAAGTCACTTTCTGTCCCTA      |
| col9a1          | +53                                     | ATCCATCAGCTCATTCAAGGAT        | ACCTGTTCAACCTTCCACTAAC      |
| col9a2          | +1.5                                    | ATGGCATCGACGTGAGTATCTA        | GGGGTTTTCTCTGAAACAAACAG     |
| col9a3          | +3.5                                    | GAGTCTGTGGCTCATTCTTCT         | TAACCTTGGGACAGCAGCTATT      |
| dcn             | -103                                    | TCTTTACCAGGGAGCAGAGAAC        | ATCCTAGGAGCTTTGTGAGCAC      |
| dmrt3           | +0.4                                    | ACAAGCGCTACTGTCGTTCAA         | GCTCGATGATCAGGACTCACTT      |
| emid2           | +123                                    | AAGCAAACCTCTGTCTCCACTC        | CTATGGCATCTGAGTCCACAGT      |
| fmod            | +4.4                                    | CGACCTTTGAGCCTCTTTCTAA        | AGTGGGAGGGAAATTAATGCT       |
| gpc1            | -16.8                                   | TGAGGAGCTTGTGTCTCCT           | GCTGAGAGCCTTTAGATGTTCA      |
| hoxa9           | TSS                                     | ATGTTGACTGGCGATTTTCC          | AGAGAACTGCCAACCCCTCAA       |
| hoxc8           | +0.9                                    | CTGGGAGATTGAAAGGCTTG          | ATCTCCCCAAGTTTGGCTTT        |
| meg3            | TSS                                     | AAACAACGCTCTCCTTTCTAAG        | AAATAACCCCAACTGGTGATTG      |
| mmp14           | +1.7                                    | TCTGCTTAAGTGGGTATGGT          | CTCTCCAGCTCAACATCAAGTCT     |
| pcolce          | +0.16                                   | TGTGGAAGCCATCTGAAAGATA        | GCTGCCCTAACCTCCTTTCT        |
| postn           | -2.5                                    | CATCCGCTTATGTTTTGTGTG         | CATTACACTGCCACGCTTACTC      |
| sema5b          | +132                                    | AAACCTCAAAGCCAGGACACA         | ACTTGGTCCCGAGTTGATGGAA      |
| zic3            | -2.9                                    | CGCAAGTCTTTCCAGAGTC           | TTGGTATGGGTGGGAGTTTC        |

## Real-time PCR primers

| Gene Name            | Forward primer          | Reverse primer          |
|----------------------|-------------------------|-------------------------|
| ActB                 | CTCCCCGGGCTGTATTCC      | CCTCTCTTGTCTGGGCCTC     |
| Bglap1 (osteocalcin) | AGGAGGGCAATAAGGTAGTGAAC | ACAAGCAGGGTTAAGCTCACA   |
| Col1a1               | CGGCTCCTGCTCCTCTTAG     | GACCCCTAGGCCATTGTGTATG  |
| Col1a2               | GCAGGTTACCTACTCTGTCTCCT | AGGCGAGATGGCTTATTTGTT   |
| Dcn                  | GCTAGACCTGCAAAACAACAAA  | GTTTGAATGCCTCTGGACTGAT  |
| Ibsp                 | AAATGGAGACGGCGATAGTTC   | GTCTTCATTCCCTCAGAATCTT  |
| Prdm5                | TCAGAAAAGCGGCTTATAACTG  | CCACTTGATCGAGCCTCTTGAAG |
| Rpl0                 | TTTATTGTGGGAGCAGAC      | CAGCAGTTTCTCCAGAGC      |
| Rrn18s               | TTGACGGAAGGGCACCACCAG   | GCACCACCACCCAGGAATCG    |
| Runx2                | CGGGAATGATGAGAAGTACTCC  | CCACAATCTCAGATCGTTGAA   |
| Sp7 (Osterix)        | CTACCAGCTCCCTTCTCAAG    | GGGTGGGTAGTCAATTTGCATAG |
| Ubc                  | AGCCAGTGTACCACCAAG      | ACCCAAGAACAAAGCACAAGG   |
